1 **Title: Wildebeest migration in East Africa: Status, threats and**  
2 **conservation measures**

3 **Running head: Status of wildebeest migration in East Africa**

4 Fortunata U. Msoffe<sup>1,7,9†</sup>, Joseph O. Ogutu<sup>1,2\*†</sup>, Mohammed Y. Said<sup>1,3,4</sup>, Shem C.  
5 Kifugo<sup>1,5</sup>, Jan de Leeuw<sup>1,6</sup>, Paul Van Gardingen<sup>7</sup>, Robin S. Reid<sup>1,8</sup>, JA Stabach<sup>10</sup>,  
6 Randall B. Boone<sup>11</sup>

7

8 <sup>1</sup>International Livestock Research Institute, P.O. Box 30709-00100, Nairobi, Kenya

9

10 <sup>2</sup>University of Hohenheim, Institute for Crop Science-340, 70599 Stuttgart, Germany

11

12 <sup>3</sup>Kenya Market Trust, 14 Riverside, Cavendish Block 3rd Floor, Suite B, Riverside  
13 Drive P.O. Box 44817 – 00100, Nairobi, Kenya

14

15 <sup>4</sup>Institute for Climate Change and Adaptation, University of Nairobi, P.O. Box 30197,  
16 00100, Nairobi, Kenya.

17

18 <sup>5</sup>Northern Rangelands Trust, Private Bag, Isiolo 60300, Kenya.

19

20 <sup>6</sup> International Soil Reference and Information Centre (ISRIC) P.O. Box 353 6700 AJ  
21 Wageningen, The Netherlands.

22

23 <sup>7</sup>Centre for the Study of Environmental Change and Sustainability, School of  
24 Geosciences, University of Edinburgh, Edinburgh, Scotland, UK

25

26 <sup>8</sup>Centre for Collaborative Conservation and Department of Ecosystem Science and  
27 Sustainability, Colorado State University, Fort Collins, CO, USA

28

29 <sup>9</sup>Tanzania National Parks Authority, P.O. Box 3134, Arusha, Tanzania

30

31 <sup>10</sup>Conservation Ecology Center, National Zoological Park, Smithsonian Conservation  
32 Biology Institute, Front Royal, VA, USA

33

34 <sup>11</sup>Natural Resource Ecology Laboratory Colorado State University Fort Collins, CO

35 80523-1499

36 †Joint first authors

37 Fortunate Msoffe: [fortu2\\_2@yahoo.com](mailto:fortu2_2@yahoo.com)

38 Joseph Ogutu: [jogutu2007@gmail.com](mailto:jogutu2007@gmail.com)

39 Mohammed Said: [msaid362@gmail.com](mailto:msaid362@gmail.com)

40 Shem Kifugo: [ckifugo2014@gmail.com](mailto:ckifugo2014@gmail.com)

41 Jan de Leeuw [jan.deleeuw@wur.nl](mailto:jan.deleeuw@wur.nl)

42 Paul van Gardingen [p.vangardingen@gmail.com](mailto:p.vangardingen@gmail.com)

43 Robin Reid [Robin.Reid@colostate.edu](mailto:Robin.Reid@colostate.edu)

44 Jared Stabach [stabachj@si.edu](mailto:stabachj@si.edu)

45 Randall Boone [Randall.Boone@colostate.edu](mailto:Randall.Boone@colostate.edu)

46

47 \*Corresponding author:

48 Current Address: Institute for Crop Science-340, 70599 Stuttgart, Germany;

49 Tel: +49-711-459 23022; Fax: +49-711-459-24345;

50 E-mail: [jogutu2007@gmail.com](mailto:jogutu2007@gmail.com)

51

## 52 **Abstract**

53 Migration of ungulates is under pressure worldwide from range contraction, habitat  
54 loss and degradation, anthropogenic barriers and poaching. Here, we synthesize and  
55 compare the extent of historical migrations of the white-bearded wildebeest  
56 (*Connochaetes taurinus*) to their contemporary status, in five premier East African  
57 ecosystems, namely the Serengeti-Mara, Masai Mara, Athi-Kaputiei, Amboseli and  
58 Tarangire-Manyara. The current status, threats to migration, migratory ranges and  
59 routes for wildebeest were characterized using colonial-era maps, literature reviews,  
60 GIS and aerial survey databases, GPS collared animals and interviews with long-term  
61 researchers. Interference with wildebeest migratory routes and dispersal ranges has  
62 stopped or severely threatens continuation of the historical migration patterns in all  
63 but the Serengeti-Mara ecosystem where the threat level is relatively lower.  
64 Wildebeest migration has collapsed in Athi-Kaputiei ecosystem and is facing  
65 enormous pressures from land subdivision, settlements and fences in Amboseli and  
66 Mara ecosystems and from cultivation in Tarangire-Manyara ecosystem. Land use  
67 change, primarily expansion in agriculture, roads, settlements and fencing,  
68 increasingly restrict migratory wildebeest from accessing traditional grazing resources  
69 in unprotected lands. Privatization of land tenure in group ranches in Kenya and  
70 settlement policy (villagization) in Tanzania have accelerated land subdivision,  
71 fencing and growth in permanent settlements, leading to loss of key wildebeest  
72 habitats including their migratory routes and wet season calving and feeding grounds.

73 These processes, coupled with increasing human population pressures and climatic  
74 variability, are exerting tremendous pressures on wildebeest migrations. Urgent  
75 conservation interventions are necessary to conserve and protect the critical  
76 wildebeest habitats and migration routes in East Africa.

77

78 *Keywords:* Wildebeest; population declines; migration; migratory routes, migratory  
79 corridors, land use change; land tenure change; wildlife conservancies; agriculture;  
80 settlements; fences; human population growth; poaching; Kenya; Tanzania; Serengeti-  
81 Mara Ecosystem; Masai Mara Ecosystem; Loita Plains; Athi-Kaputiei Ecosystem;  
82 Athi-Kaputiei Plains; Amboseli Ecosystem, Western Kajiado Ecosystem, Ngorongoro  
83 Conservation Area; Tarangire-Manyara Ecosystem

#### 84 **Introduction**

85 Large mammal migrations are among the most awe inspiring of all migrations [1].  
86 These migrations, the seasonal and round-trip movement of large herbivores between  
87 discrete areas, are under increasing pressures worldwide. Globally, migrations of 6  
88 out of 24 species of ungulates are either already extinct or their status is unknown [2].  
89 Of the remaining ungulate mass migrations, most occur in six locations in Africa,  
90 including the white-bearded wildebeest (*Connochaetes taurinus* Burchell, 1823)  
91 migration in the Serengeti-Mara ecosystem of Kenya and Tanzania [2]. Range  
92 restriction and alteration, degradation and loss of habitat due to agriculture, poaching  
93 and barriers that block migration, such as fences, roads, railroads, pipelines and  
94 settlements have progressively disrupted historical migratory routes and decimated or  
95 driven rapid population declines of many of the once spectacular migratory herds over  
96 the 20<sup>th</sup> century [1,3-5] .

97

98 Because migration enables populations to grow to large abundances, its disruption  
99 leads to restricted ranges and consequent population declines [1,6,7]. The preservation  
100 of the phenomenon of migration requires conservation of both the migratory species  
101 and the habitats along their routes. It also requires a sound understanding of the  
102 factors and processes underlying the degradation and loss of migratory routes and  
103 declines of populations to devise effective strategies for protecting migratory routes,  
104 habitats and populations [1]. Although causes of ungulate migrations are not yet fully  
105 understood [8], the temporal regularity of migrations suggests that they are a response  
106 to seasonal fluctuations in spatial patterns of resource availability and quality [9,10].  
107 Thus, in the Serengeti-Mara ecosystem, rainfall through its effect on food supply and  
108 salinity of drinking surface water has been suggested as a trigger for the northward  
109 migration [11] whereas high nutrient availability on the short grass plains is thought  
110 to attract lactating female wildebeest southwards [12]. This migration results in the  
111 movement of wildebeest from the open, highly nutritive grasslands with low biomass  
112 in the wet season, to wooded grasslands with high biomass of lesser nutritive quality  
113 during the dry season [13].

114

115 We focus on populations of wildebeest sub-species in East Africa because they (1) are  
116 taxonomically closely related, (2) represent some of the most important remaining  
117 large mammal migrations on earth, (3) share similar conservation problems, (4) all  
118 have ranges within and outside protected areas, and (5) have a range of current and  
119 potential pathways to protection. The threats facing wildebeest migrations involve the  
120 interplay of multiple factors and processes [1-3,14]. In the Masailand of Kenya and  
121 Tanzania, ungulate population declines, particularly of wildebeest, are linked to

122 habitat loss due to land use change or habitat degradation caused mainly by expansion  
123 of cultivation [9,15,16]. Illegal hunting might, however, have contributed more to  
124 dwindling populations of migratory ungulates in some areas, including the Tarangire-  
125 Manyara ecosystem of Tanzania [17-19]. Wildebeest also cause problems for  
126 livestock, including competition for forage and transfer of the deadly malignant  
127 catarrhal fever virus from wildebeest calves to cattle [20,21]. The type and intensity  
128 of these factors and processes vary among migratory species and across their meta-  
129 populations or ecosystems. Effective wildlife conservation and protection thus  
130 requires clear prioritization of the factors leading to population declines both in the  
131 short-and long- term. Integral to this process is reviewing the history, status, trends  
132 and threats facing populations of particular migratory species across a range of  
133 ecosystems along the entirety of their migratory routes to extract general insights into  
134 the threats they face as a basis for developing approaches likely to succeed in  
135 conserving their populations and migrations.

136

137 We describe and compare the extent of historical migrations of the western (*C.t.*  
138 *mearnsi*) and eastern (*C.t. albojubatus*) white-bearded wildebeest with the current  
139 status of these migrations and migratory routes in five ecosystems of East Africa. We  
140 evaluate long-term wildebeest population trends, putative drivers of change and their  
141 impacts on the critical habitat and migratory ranges of wildebeest in each of the five  
142 ecosystems. We suggest potential strategies for conserving these migrations, some of  
143 which rank among the Earth's most spectacular remaining terrestrial migrations (Fig  
144 1). Lastly, we evaluate causes of wildebeest population declines and range  
145 contraction, including human population expansion, land-use change, poaching, land  
146 uses incompatible with wildlife conservation, deficiencies in existing wildlife

147 policies, institutions and markets in Kenya and Tanzania and suggest conservation  
148 strategies to alleviate the population declines.

149

150 -----Fig 1 about here -----.

151

## 152 **Materials and methods**

### 153 **Study Area**

154 This study covers the five ecosystems in East Africa with migratory wildebeest  
155 populations (Fig. 2). These include the Serengeti-Mara, Loita Plains, Athi-Kaputiei  
156 Plains, Amboseli Basin, and Tarangire-Manyara ecosystems. Across these five  
157 ecosystems, we focus on eight populations of either the western (Serengeti-Mara,  
158 Ngorongoro, Loita Plains, Narok County) or the eastern (Athi-Kaputiei, Machakos  
159 County, Amboseli, West Kajiado, Tarangire-Manyara) subspecies of the white  
160 bearded wildebeest [22]. We consider three (Ngorongoro, Narok County and  
161 Machakos) of the eight populations only superficially because they are part of at least  
162 one of the other populations considered in detail. We do not consider small, resident  
163 wildebeest populations occupying the western corridor in Serengeti and the Loliondo  
164 Game Controlled Area (LGCA) in north-eastern Tanzania [14].

165

166 The Serengeti-Mara Ecosystem covers about 40,000 km<sup>2</sup> in Tanzania and Kenya  
167 [14,23]. The ecosystem encompasses the Serengeti National Park, Ngorongoro  
168 Conservation Area, Maswa, Grumeti, Ikorongo and Kijereshi Game Reserves,  
169 Loliondo Game Controlled Area, Ikona and Makao Wildlife Management Areas in

170 Tanzania and the Masai Mara National Reserve and adjoining wildlife conservancies  
171 and pastoral ranches in Kenya.

172 The Ngorongoro Conservation Area (NCA, 8,292 km<sup>2</sup>) is part of the Greater  
173 Serengeti-Mara ecosystem. It includes the Ngorongoro Crater (310 km<sup>2</sup>) and is  
174 bordered to the north by the Loliondo Game Controlled Area (4000 km<sup>2</sup>). Lake  
175 Natron Game Controlled Area (LNGCA, 3000 km<sup>2</sup>) borders the LGCA to the  
176 southeast and the NCA to the northeast (Fig. 2).

177

178 The Narok County (17,814 km<sup>2</sup>) encompasses the Loita Plains and the Masai Mara  
179 Ecosystem in Kenya. The Athi-Kaputiei ecosystem (2,200 km<sup>2</sup>) covers the Nairobi  
180 National Park (117 km<sup>2</sup>) and the adjacent Athi-Kaputiei Plains in Kenya. Machakos  
181 County (14,225 km<sup>2</sup>) is contiguous with the Athi-Kaputiei ecosystem. The Greater  
182 Amboseli ecosystem of Kenya (7730.32 km<sup>2</sup>) covers the Amboseli National Park (392  
183 km<sup>2</sup>) and surrounding dispersal areas on pastoral rangelands, covering some 3,000  
184 km<sup>2</sup> [24-26] . Western Kajiado (11388.54 km<sup>2</sup>) is bounded by the Greater Amboseli  
185 Ecosystem to the East. Both ecosystems are found in Kajiado County of Kenya.

186

187 The Tarangire-Manyara ecosystem of Tanzania covers the Tarangire (2,850 km<sup>2</sup>) and  
188 Lake Manyara (649 km<sup>2</sup>) National Parks and Manyara Ranch (177 km<sup>2</sup>), a private  
189 conservancy that supports livestock rearing, wildlife conservation and tourism. This  
190 ecosystem is adjoined by rangelands managed primarily for cultivation, livestock  
191 grazing, legal game hunting, and tourism on community land designated as Open  
192 Areas, Game Controlled Areas or Wildlife Management Areas [15]. These include the  
193 Simanjiro Plains, the Mkungunero Game Reserve (800 km<sup>2</sup>) and Lolkisale Game



194 Controlled Area (1500 km<sup>2</sup>). Altogether, the range for the migratory wildebeest  
195 covers about 35,000 km<sup>2</sup> [17,27-30].  
196  
197 Human population growth drives sedentarization, expansion of settlements, fences  
198 and other land use developments in the study ecosystems [4,5]. These changes  
199 promote land use intensification and illegal livestock incursions into protected areas  
200 to the detriment of migratory wildebeest [31,32]. In Kenya, human population size  
201 increased in Narok County by 673% from 110,100 in 1962 to 850,920 in 2009; in  
202 Kajiado County by 905% from 68,400 in 1962 to 687,312 in 2009 and in Machakos  
203 County by 247% from 571,600 in 1962 to 1,983,111 in 2009 [33]. Similarly, in  
204 Tanzania human population size increased in the Serengeti District by 11.6% from  
205 249,420 in 2012 to 282,080 in 2017 and in Monduli and Simanjiro Districts,  
206 containing the Tarangire-Manyara Ecosystem, by 13.5% from 460,775 people in 2012  
207 to 532,939 in 2017 ([www.nbs.go.tz](http://www.nbs.go.tz)).  
208  
209 Across the Serengeti-Mara ecosystem, Narok County, Masai Mara ecosystem and the  
210 Loita Plains, rainfall is markedly bimodal and increases steeply along a southeast–  
211 northwest gradient, from east to west, south to north and over time [34]. Notably,  
212 rainfall increases from 500 mm on the Serengeti Plains to the Southeast to 1400 mm  
213 to the north-west of Masai Mara National Reserve. Across the Kajiado County in  
214 which the Amboseli, Athi-Kaputiei and Western Kajiado Ecosystems are found,  
215 rainfall is low, bimodal and highly variable, and total annual rainfall averages 685  
216 mm (range 327-1576 mm). The short rains fall from November to December ( $30.97 \pm$   
217  $27.85\%$  of the annual total) and the long rains from March to May ( $47.5 \pm 15.06\%$  of  
218 the annual total). The dry season rains fall during June- September. Rainfall is

219 markedly variable in space and increases with elevation such that it averages 300  
220 mm/yr in the low-lying Amboseli basin and rises to 1250 mm/yr on the slopes of Mt.  
221 Kilimanjaro and Chyulu Hills in the southeast of the County to 800 mm in Nairobi  
222 National Park and 971 mm at Ngong hills in the northwest of the County [26].  
223 Rainfall increases from under 500 mm in the extreme southeast of the Athi-Kaputiei  
224 Plains to over 800 mm in northern Nairobi Park [35]. In the Tarangire-Manyara  
225 ecosystem, rainfall is bimodal and averages 650 mm per annum. The short rains span  
226 from October to December and the long rains from March to May. The rains are  
227 unreliable and frequently fail, especially the short rains [15]. Land use patterns in the  
228 study ecosystems are described comprehensively elsewhere [15,26,34-36].

229

230 -----Fig. 2 about here -----.

231

## 232 **Historical wildebeest migrations in East Africa**

233 Information on the migratory wildebeest range, routes and status was compiled from  
234 literature reviews, colonial-era records, maps, GIS databases, Global Positioning  
235 System (GPS) collared wildebeest and interviews with local residents and researchers  
236 knowledgeable about the study ecosystems. We reviewed historical records to provide  
237 a context for assessing changes in wildebeest migrations in East Africa.

## 238 **Mapping contemporary wildebeest migratory routes and ranges**

239 To obtain information on contemporary wildebeest movements, we placed GPS  
240 collars on 15 wildebeest in the Loita Plains in the Mara Ecosystem in May 2010, 12 in  
241 the Athi-Kaputiei Plains and 9 in the Amboseli Basin in October 2010. The collars

242 were programmed to collect the position of each wildebeest 16 times each day (every  
243 hour from 6:00 AM to 6:00 PM and every three hours from 6:00 PM to 6:00 AM) for  
244 a 2-year study period. Data are available on Movebank ([www.movebank.org](http://www.movebank.org))

245

246 In the Tarangire-Manyara ecosystem, OIKOS and Tanzania National Parks [37]  
247 tracked movements of radio collared wildebeest and zebra and GPS collared elephants  
248 (*Loxodonta africana*) during 1995-2002 to establish if they still used the main  
249 migratory routes identified earlier [38]. OIKOS also established the presence or  
250 absence of migratory routes and assessed wildlife species abundance in the ecosystem  
251 during 1995-2002 by interviewing local communities, hunting operators, employees  
252 and residents and conducting multiple aerial reconnaissance and systematic  
253 reconnaissance flights. Several studies later mapped and analysed land use changes  
254 along the migratory corridors [36,39]. We did additional unstructured interviews on  
255 the status of the migration routes in the ecosystem during 2006-2007. Our interviews  
256 targeted long-term local residents and researchers and were carried out during ground  
257 truthing work for imagery analysis on historical land use and cover changes in the  
258 ecosystem from 1984 through 2000 to 2006-2007. Local Masai elders who knew the  
259 history of the ecosystem well helped with the ground truthing and interviewing local  
260 residents about land use and cover changes. The field data form used for our  
261 interviews is provided in Table S1.

262

### 263 **Wildebeest population trends**

264 Wildebeest population estimates were compiled from aerial surveys conducted in  
265 Kenya by the Directorate of Resource Surveys and Remote Sensing (DRSRS) and in  
266 Tanzania by the Tanzania Wildlife Research Institute (TAWIRI), Tanzanian Wildlife

267 Conservation Monitoring Unit (TWCM) and Frankfurt Zoological Society (FZS). The  
268 methods used in the aerial surveys and for estimating population size are described in  
269 detail elsewhere [33,40-42] . Aerial surveys began in the Athi-Kaputiei ecosystem in  
270 1949 [43], in the Serengeti-Mara ecosystem in 1957 [44-46]), in the Tarangire-  
271 Manyara ecosystem in 1964 [27] and in Amboseli in 1973 [47].

272

### 273 **Distribution of cultivation and fences**

274 Data on the distribution of agriculture were obtained from the FAO Africover project  
275 2000 [48]. The project mapped land cover for the year 2000 for the whole of East  
276 Africa from Landsat images (30 m resolution) and updated the Kenya map in 2008.  
277 The map category ‘agriculture’ was extracted from the Africover data set and clipped  
278 according to the study area boundary. In the Athi-Kaputiei ecosystem fences were  
279 mapped in 2004 and 2009 by the International Livestock Research Institute (ILRI)  
280 and African Wildlife Foundation (AWF) in collaboration with the local communities  
281 and local NGO’s using hand-held (GPS, with scientific, technical and logistical  
282 support provided by ILRI [4,5,35]. Fences, settlements, roads and other  
283 infrastructures were similarly mapped with hand held GPS in Amboseli in 2004-2006  
284 [49,50] and in Masai Mara in 1999, 2002 and 2015 [51-54]. A few fences also exist in  
285 the ecosystem in Tanzania.

286

### 287 **Wildlife conservation initiatives and gaps in policies, institutions and markets in** 288 **Kenya and Tanzania**

289 We reviewed official records on contemporary wildlife conservation initiatives and  
290 identified important gaps in wildlife policies, institutions and markets in Kenya and  
291 Tanzania.

292

### 293 **Statistical Analysis**

294 Estimates of wildebeest population size for each ecosystem were obtained using  
295 Jolly's method II for transects of unequal lengths [55] and related to the year of  
296 survey using negative binomial regression models with linear and quadratic  
297 polynomial terms and serial autocorrelation in the counts accounted for using the first-  
298 order autoregressive model. Selection between the linear and quadratic models was  
299 based on the Akaike Information Criterion [56]. The models were fitted using the  
300 SAS GLIMMIX procedure [57]. Temporal trends in wildebeest population size were  
301 modeled using a semiparametric generalized linear mixed model with a negative  
302 binomial error distribution and a log link function in SAS GLIMMIX procedure [33].  
303 The percentage change in population size between the start and end dates of the  
304 surveys was estimated for each ecosystem. For some ecosystems predicted population  
305 size for two to three consecutive surveys were averaged and used to compute the  
306 averages to minimize the effect of stochastic noise due to small sample size or areal  
307 coverage.

308

## 309 **Results**

### 310 **Historic and contemporary migratory routes**

311 The seasonal migration of the white-bearded wildebeest and zebra (*Equus quagga*  
312 *burchelli*) from the Serengeti Plains in Tanzania to Masai Mara in Kenya [14,46] is  
313 called the southern migration. It differs from the northern migration that involves  
314 seasonal movements of wildebeest, zebra and Thomson's gazelle (*Gazella thomsoni*)  
315 between the Loita Plains and Masai Mara National Reserve within the Narok County  
316 of Kenya [9,10,16,58]. The wildebeest involved in the northern migration form the  
317 bulk of the Narok County population.

318

319 The migration ranges, routes and population trends of the Serengeti-Mara wildebeest  
320 have been extensively studied (e.g., [59,60], Table S2). After rinderpest killed about  
321 95% of this population between 1890 and 1892, it remained low till 1962. The  
322 population increased from 263,362 in 1961 to 483,292 in 1967 following veterinary  
323 removal of rinderpest in wildebeest in 1962 and again from 1967 to 1.4 million in  
324 1977, coincident with an increase in the dry season rainfall [61,62].

325

326 The migration pattern of the Serengeti-Mara wildebeest in the 1940s and 1950s was  
327 different from what it is today. Then, wildebeest migrated periodically between the  
328 Kenya's Loita Plains and Tanzania [63,64]. Heavy harvesting of wildebeest (plus  
329 zebra and other species) in Narok County during World War II to provide meat for  
330 labour and prisoners of war and reduce competition with Masai livestock until 1947  
331 [64 reduced their population. Even so, wildebeest population on the Loita Plains  
332 numbered about 50,000-100,000 individuals prior to 1947 [45]. Thereafter, the

333 population further declined drastically because the Loita Plains were opened up to  
334 uncontrolled commercial meat-hunters for a short period after World War II [67].  
335 Subsequently, the Mara population (including the Loita Plains) numbered about  
336 15000 by 1958 [45] and 17,817 by 1961 [65].  
337  
338 The Mara wildebeest [45,46,58,66] were formerly more numerous and their  
339 distribution extended far beyond their contemporary range in the Mara region of  
340 Narok County. But major land use and cover changes have progressively degraded  
341 and reduced the historical wildebeest habitats [9,68].  
342  
343 Wildebeest occupied parts of the Rift Valley extending from the Tanzania border  
344 north to Kedong Valley in Kenya and in the early 1900s, to the eastern and southern  
345 shores of Lake Naivasha [46, 69-75]. Thus, in 1902, Meinertzhagen [74] recorded  
346 wildebeest on the flats east of Lake Naivasha. Moreover, based on annual hunting  
347 returns, wildebeest were shot in Naivasha in 1906-07 [70] and in the Rift Valley in  
348 1909-10 [71]. The Mosiro Plateau in Narok County was the probable link between the  
349 Rift and Serengeti-Mara wildebeests when the Plateau landscape was still open and  
350 had tall grass, few gullies and bushes [46]. Livestock overgrazing degraded the  
351 plateau making it impassable for wildebeest by early 1960s [46]. Part of this  
352 wildebeest population also occupied the centre and west of the Rift Valley, near Mt.  
353 Suswa, south of Naivasha in 1909 and 1910 [73]. Their distribution extended to the  
354 East Rift Wall, near Kijabe in central Kenya [76]. But, all the wildebeest populations  
355 in the northern area of the Rift Valley in Kenya became extinct before 1962 because  
356 of hunting and fencing of ranches around Lake Naivasha and in the Rift neighbouring  
357 Suswa area [46]. Wildebeest were later re-introduced on the Crescent Island in Lake

358 Naivasha and slowly spread, or were physically moved, to other surrounding areas.  
359 Their population increased steeply in Nakuru Conservancy in the Nakuru-Naivasha  
360 region of Kenya during 1996-2015 [77]. Wildebeest were also found in several other  
361 parts of Kenya in earlier years where they have since been exterminated. In particular,  
362 returns of game animals shot on license in 1909-10, show wildebeest were found on  
363 the Mau Plateau in Narok County, the Kisii region in Southwestern Kenya, Laikipia  
364 and North Uaso Nyiro in Central Kenya, Makindu and Voi in southeastern Kenya  
365 [71].

366

367 A small wildebeest population occurs in the Ngorongoro Conservation Area in  
368 Tanzania [78,79]. It concentrates in the Crater in the dry season but disperses to areas  
369 outside the Crater in the wet season, including the Lake Natron Game Controlled  
370 Area. During the early dry season wildebeest sometimes move east from the Serengeti  
371 short grass plains into Ngorongoro Crater/Conservation Area and leave at the onset of  
372 the rains but a smaller residual population remains in the Crater during the rainy  
373 season [46,63]. Wildebeest from the NCA and the Serengeti short grass plains also  
374 migrate to the south-eastern part of the LGCA.

375

376 The Athi-Kaputiei, Amboseli, Western Kajiado and Machakos County wildebeest  
377 populations were historically part of a single large migratory population that used to  
378 range over most of the present day Kajiado County in Kenya until the 1960s before it  
379 split up into three rather distinct populations [22,26,35,76]. The western Kajiado  
380 population is currently non-migratory. The Athi-Kaputiei wildebeest population uses  
381 the Nairobi National Park during the dry season due to its reliable water supply and  
382 abundant grass and move to calve on the pastoral lands to the southeast of the park



383 during the wet season [4,5,35,80-83]. The Athi-Kaputiei wildebeest population was  
384 centred on the Athi-Kaputiei Plains in the wet season prior to the 1920s. Historically,  
385 some Athi-Kaputiei wildebeest may have migrated south to the Amboseli ecosystem  
386 [46,67,76]. They intermingled with the then larger Amboseli population centred on  
387 the Amboseli Plains north of Kilimanjaro in the wet seasons. Both populations were  
388 migratory and moved to water in the hills and woodlands in the dry seasons and  
389 returned to the plains in the wet seasons. In very dry periods many wildebeest from  
390 both populations moved northeast and south, including into Tanzania [46].

391

392 The Athi-Kaputiei wildebeest moved north, east, and south in the wet season but  
393 spent the dry season on the Athi-Kaputiei Plains until at least 1927 [46,67,76] . The  
394 Athi-Kaputiei wildebeest population migrated as far north as the Thika River in the  
395 dry season but only few went beyond this point [46,67,76]. A resident wildebeest  
396 population north of the Thika River and another near Juja, both northeast of Nairobi  
397 in Kenya [46,75,76] went extinct. The Athi-Kaputiei wildebeest population also  
398 migrated as far north as Muranga (Fort Hall) and the Yatta Plateau, south of the Tana  
399 River [63]. De Beaton [84] recorded animal movements from the Nairobi National  
400 Park westwards towards the Ngong Hills and to the south. The Nairobi-Mombasa  
401 Road and later the park fence bordering this road interrupted the northward migration  
402 of wildlife to Nairobi, Ruiru-Thika and Ol Donyo Sapuk in the dry season. When a  
403 fence was first erected around Nairobi in the early 1900s, it killed many animals,  
404 including wildebeest [85]. A fence constructed in 1967 along the eastern side of the  
405 Ngong Hills and South of the Kiserian River and that joined the south-western corner  
406 of the Nairobi Park fence, further disrupted the dry-season migration of wildlife to the  
407 Ngong Hills [81,86].

408

409 Large areas of the Athi-Kaputiei Plains were ploughed and planted with wheat to  
410 contribute to war time food production during World War II. The wheat attracted  
411 large wildlife herds, including wildebeest, which were shot as part of crop protection  
412 [87]. This population dispersed periodically to the adjoining Machakos County,  
413 especially during droughts, but more recently, due to displacement by extreme land  
414 use changes and developments in the Athi-Kaputiei Ecosystem [5,33,35,83,88].

415

416 The migration and ranges of the Amboseli and West Kajiado wildebeest populations  
417 are described by several authors [22,25,46,63,67,75,76]. Occasional old bulls moved  
418 from the Rift near Lake Magadi area in western Kajiado to Nairobi area in the 1920s  
419 [76]. Wildlife, especially wildebeest and zebra, were also harvested in large numbers  
420 in Kajiado County (Amboseli Ecosystem) during World War II to provide meat for  
421 labour and prisoners of war; free meat for the Kamba people because of famine  
422 caused by severe drought; and after the end of the war to reduce competition with  
423 Masai livestock for forage [64,67].

424

425 In the Tarangire-Manyara Ecosystem, the migratory wildebeest occupy the Tarangire  
426 National Park in the dry season but disperse to their wet season ranges and calving  
427 grounds on the Simanjiro Plains, the Mkungunero Game Reserve, Lolkisale Game  
428 Controlled Area, Manyara Ranch, Lake Manyara National Park and adjacent game  
429 controlled areas (used mainly as hunting areas) in the wet season. OIKOS and  
430 TANAPA [37] confirmed that nine main migratory routes that Lamprey [38] had  
431 identified earlier in the Tarangire-Manyara ecosystem, were still being used during  
432 1995-2002.

433

434 Wildebeest migrated from within protected areas in the dry season to dispersal areas  
435 outside conservation areas in the wet season in all the ecosystems but the Serengeti-  
436 Mara ecosystem where the migration occurred mostly within the protected areas (Fig.  
437 2). Wildebeest migration has discontinued altogether in parts of the ecosystems, and  
438 reduced along a number of historical routes (Fig. 3).

439

440 -----Fig. 3 about here -----.

441

442 Notably, the decline and discontinuation of migration happened in four out of the five  
443 ecosystems where wildebeest migrated outside protected areas. No discontinuation of  
444 migration is reported from the Serengeti-Mara ecosystem where wildebeest migrates  
445 almost entirely within protected areas. Discontinued or currently less intensively used  
446 migration routes overlapped with agricultural and settlement expansion in the Mara  
447 and Tarangire-Manyara ecosystems and fences, settlements and roads in the Athi-  
448 Kaputiei Plains (Fig. 3). Fig. 3 does not include settlements, which is another main  
449 cause of change to the migratory routes in the study ecosystems.

450

451 -----Fig 4 about here-----.

452

453 Movement data ( $n = 279,718$  fixes) from the GPS collared wildebeest showed the  
454 migration routes during 2010-2013 (Fig. 4). Several features of the wildebeest  
455 movements and space use are noteworthy. Wildebeest primarily used habitats outside  
456 of the protected areas in the Mara, Athi-Kaputiei and Amboseli ecosystems ( $> 87\%$  of

457 the 279,718 fixes). This emphasizes the importance of pastoral lands and community-  
458 based conservation to the protection of the three wildebeest populations. In particular,  
459 the Loita Plains wildebeest heavily used the wildlife conservancies adjoining the  
460 Masai Mara National Reserve to the north. Hence, when both the reserve and  
461 conservancies are considered, 73.4% (85,194 of 116,061 fixes) of the Loita Plains  
462 wildebeest locations fell within the conservation area boundaries. Further, one  
463 wildebeest collared in Loita Plains moved south through the LGCA to the NCA in  
464 Tanzania, covering a total of 205.4 km from its initial collaring location (Fig. 4b).  
465 This route approximates the historical migration route of the Loita wildebeest up to  
466 the 1950s [63]. This reinforces the critical importance of LGCA to Serengeti-Mara,  
467 Loita and Ngorongoro wildebeest migrations and to the ecological integrity of the  
468 Greater Serengeti-Mara ecosystem.

469

470 The Nairobi-Namanga tarmac road, bisecting the wet season range of the Athi-  
471 Kaputiei wildebeest, has split the population into two distinct sub-populations,  
472 concentrated on the eastern and western sides of the road (Fig. 4b). Collaring  
473 locations and direct field observations showed that no collared wildebeest crossed the  
474 tarmac road during the 2010-2013 study period. Lastly, the Amboseli wildebeest  
475 population also moved widely, including into the adjoining Longido District in  
476 Tanzania, reflecting the historical migration routes for this population [46,76]. One  
477 wildebeest collared in the Amboseli Basin travelled 6,197.8 km over 728 days during  
478 the study period. Further details on the collared wildebeest movements can be found  
479 in Stabach [88].

480

481 **Wildebeest population trends**

482 The Serengeti-Mara wildebeest population grew steadily from 190,000 in 1957  
483 following the veterinary eradication of rinderpest in cattle in 1962 [90], until 1977  
484 when it stabilized with one noticeable decline during 1993, when a severe drought  
485 reduced the population from around 1.2 million to less than 900,000 animals [91] (  
486 Fig. 5a). The population has since then recovered and stabilized at around 1.3 million  
487 animals [14] though the more recent population size estimates suggest some slight  
488 upward trend (Fig. 5a). The estimated population size and standard errors and other  
489 details of the aerial surveys for all the eight study ecosystems are provided in S1-S5  
490 Datas.

491

492 The Loita Plains wildebeest population declined steadily from about 123,930 animals  
493 in 1977-1978 to around 19,650 animals by January 2016 (Fig. 4b), a decrease of  
494 80.9%. This decline was highly significant (Table 1). The population of the Serengeti  
495 migrants coming to the Mara ecosystem in the dry season (July-October) similarly  
496 decreased by 73.4% from 587,500 in July-August 1979 to 157,124 animals in  
497 November 2016. The dramatic decline was also evident for the Narok County  
498 wildebeest population (Table 1, Fig. 5c, S2 Data).

499

500 The Athi-Kaputiei wildebeest population suffered a 95% decline in numbers from  
501 over 26,800 animals in 1977-1978 to less than 10,000 by the mid-1990s and under  
502 3,000 animals in 2007-2014. The decline of this population has been much more  
503 dramatic in recent decades, leading to a virtual collapse of the migration (Fig. 5d).  
504 The catastrophic decline is highly significant (Table 1, S3 Data). A recent 1298%  
505 increase in Machakos County population, coincident with the decrease in the Athi-

506 Kaputiei population (Fig. 5e), is not statistically significant likely because of a large  
507 variance in the population estimates (Table 1, S4 Data). This strongly suggests that  
508 some wildebeest migrated from the Athi-Kaputiei rather than died.

509

510 The migratory wildebeest population in the Amboseli ecosystem also declined by  
511 84.5% from about 16,290 animals in 1977-1979 to 2,375 by 2010-2014 (Fig. 5f). The  
512 population fluctuated between 16,290 and 20,000 individuals and increased to 33,000-  
513 37,000 individuals during 1978-1986 and fell to 16,779 animals by 2007. The  
514 population declined to under 5,000 animals in 2010 following a severe drought in  
515 2008-2009 (Fig. 5f) and has not recovered ever since. This decline is highly  
516 statistically significant (Table 1). The non-migratory wildebeest population in West  
517 Kajiado decreased by 44% from 5,700 animals in 1977-1979 to 3200 animals in 2010-  
518 2014 but this decrease is not statistically significant likely due to large variances in  
519 population size estimates (Table 1, Fig. 5g, S5 Data).

520

521 The Tarangire-Manyara population first increased from an estimated 24,399 animals  
522 in 1987 to 48,783 animals in 1990. Thereafter the population fell precipitously to  
523 13,603 animals by 2016 without signs of recovery (Fig. 5h). This extreme population  
524 decline is statistically significant (Table 1) despite the large variances in the  
525 population estimates (S5 Data).

526

527 -----Fig. 5 about here-----

528

529 **Table 1.** Results of the regression of wildebeest population size on year of survey.

530 NDF and DDF are the numerator and denominator degrees of freedom, respectively.

| Region         | Number<br>of surveys | Intercept | Linear<br>Slope | Quadratic<br>slope | NDF            | DDF | F     | P > F   |
|----------------|----------------------|-----------|-----------------|--------------------|----------------|-----|-------|---------|
| Serengeti-Mara | 22                   | -4785.20  | 4.8075          | -0.00120           | <sup>a</sup> 1 | 19  | 39.84 | <0.0001 |
|                |                      |           |                 |                    | <sup>b</sup> 1 | 19  | 39.41 | <0.0001 |
| Mara           | 21                   | 13272     | -13.2237        | 0.0033             | <sup>a</sup> 1 | 18  | 11.40 | 0.0034  |
|                |                      |           |                 |                    | <sup>b</sup> 1 | 18  | 11.26 | 0.0035  |
| Narok County   | 17                   | 62.966    | -0.0261         |                    | 1              | 15  | 7.52  | 0.0151  |
| Athi-Kaputiei  | 25                   | 11.68     | -0.00024        |                    | 1              | 23  | 18.74 | 0.0002  |
| Machakos       | 5                    | -94.57    | 0.0511          |                    | 1              | 3   | 1.53  | 0.3046  |
| Amboseli       | 21                   | -15810    | 15.8951         | -0.0023            | <sup>a</sup> 1 | 18  | 13.04 | 0.0020  |
|                |                      |           |                 |                    | <sup>b</sup> 1 | 18  | 13.11 | 0.0020  |
| West Kajiado   | 18                   | 42.56     | -0.01715        |                    | 1              | 16  | 2.39  | 0.1417  |
| Tarangire      | 8                    | 156.64    | -0.07808        |                    | 1              | 5   | 11.16 | 0.0205  |

531 <sup>a</sup>Linear slope, <sup>b</sup>Quadratic slope

532

## 533 Discussion

### 534 Wildebeest movements and migratory routes

535 Animal movement depends on individual fitness and is essential for accessing  
 536 favoured resources, finding potential mates and escaping deteriorating habitat  
 537 conditions [92]. As expected, the GPS collared wildebeest moved more, in virtually  
 538 all measured aspects, in Amboseli, the least productive and least anthropogenically  
 539 disturbed of the three Kenyan ecosystems, than in the Loita Plains and Athi-Kaputiei.  
 540 The productivity of Amboseli grasslands has reduced even further in recent years

541 [93,94], apparently forcing wildebeest to move over larger areas in search of food in  
542 the dry season [95]. Wildebeest surprisingly moved less in Athi-Kaputiei than in  
543 either the Amboseli or Loita Plains even though the Loita Plains had the greatest  
544 availability of resources of the three landscapes. This is unexpected even if the  
545 wildebeest decline in the Athi-Kaputiei has reduced intraspecific competition and the  
546 need to move to locate resources. High livestock density likely heightens interspecific  
547 competition with wildebeest for resources and thus could force wildebeest to move  
548 more in Athi-Kaputiei. The reduced wildebeest movements in the Athi-Kaputiei  
549 landscape therefore reflect its high degree of anthropogenic disturbance and  
550 truncation [5], preventing needed further movement [88]. It follows that resource  
551 availability and anthropogenic disturbance determine wildebeest movements.  
552 Consequently, because wildebeest occur primarily outside protected areas, except in  
553 the Serengeti-Mara, controlling the rate and type of anthropogenic change in these  
554 areas is crucial to maintaining the long-term viability of their populations and  
555 migrations.

556

### 557 **Wildebeest population declines**

558 Migratory wildebeest population size and their routes declined in all the five  
559 ecosystems except the Serengeti-Mara. The declines are related to expansion of  
560 agriculture, settlements, fences and roads that progressively occlude wildebeest  
561 grazing resources and migratory routes (Table 2). Even though it was not possible to  
562 formally test if these processes caused the declines, literature review, interviews and  
563 collared wildebeest movements, suggest that they are all important. In all the four  
564 ecosystems where they are declining, agricultural encroachment excludes wildebeest  
565 from part of their seasonal ranges. Notably, irrigated agriculture encroached the



566 swamps that ring the base of Mt. Kilimanjaro, denying wildebeest access to their  
567 critical dry season dispersal areas in Amboseli [24,25,96]. Settlements also interfere  
568 with wildebeest movements in the Mara [31,34,52], Tarangire-Manyara [15,18] and  
569 Athi-Kaputiei [4,5,35] by blocking their migratory routes and access to resources.  
570 Further, although wildebeest avoid anthropogenic disturbances [97], they are attracted  
571 to short grass created by livestock grazing outside protected areas on pastoral lands  
572 with moderate densities of pastoral settlement and livestock [21,98].  
573  
574 Land fragmentation through fencing, roads and settlements primarily exclude  
575 wildebeest from their grazing ranges in the Athi-Kaputiei ecosystem [5] (Table 2). In  
576 Kitengela, a major part of the Athi-Kaputiei Plains adjoining Nairobi National Park,  
577 fenced land parcels have spread throughout the range of wildlife and movements of  
578 people, livestock, dogs and vehicles harass wildlife [4,5,35]. Fences impede  
579 wildebeest movements between the Nairobi Park and the Athi-Kaputiei Plains  
580 [4,5,35]. Similarly, the Nairobi-Namanga road has effectively truncated the  
581 ecosystem, splitting the Athi-Kaputiei population into two separate sub-populations  
582 [89]. The Athi-Kaputiei landscape is also fragmented and degraded by large, un-  
583 rehabilitated mines, mining waste, unregulated development, commercial charcoal  
584 burning and sand harvesting, all of which restrict wildebeest habitats and obstruct  
585 their migratory routes. Invasive weeds are also spreading in the rangelands and at  
586 abandoned settlement sites in Athi-Kaputiei, degrading wildebeest habitats  
587 [5,35,51,99]. Fences [100,101] are also increasing rapidly in the Mara, including in  
588 the Loita Plains, following land subdivision and privatization of land ownership.  
589

590 The loss of connectivity restricts the mobility and flexibility of migratory wildebeest,  
591 especially during droughts when heavy mortality can result where wildebeest access  
592 to water and food is blocked [102-104] . The risk of outbreaks of zoonotic diseases  
593 and population declines can also increase if ungulate migrations are curtailed by  
594 degraded habitats yet climate change increases the frequency and severity of droughts  
595 [105]. Climate change may amplify the frequency of outbreaks of zoonotic diseases  
596 by modifying host and vector population characteristics that control pathogen  
597 transmission, including concentration in key resource areas, population density,  
598 prevalence of infection by zoonotic pathogens, and the pathogen load in individual  
599 hosts and vectors [106,107]. Also, calving wildebeest transmit bovine malignant  
600 catarrhal fever (BMCF) virus to livestock where the two species co-occur, causing  
601 livestock losses [20]. The risk of transmitting the BMCF virus is elevated where  
602 habitat loss and degradation force livestock and wildebeest to use the same areas.

603

604 Another leading cause of wildebeest decline is poaching, which removes 6-10% of the  
605 Serengeti-Mara wildebeest annually [108,109]. Poaching is also common in the other  
606 ecosystems, including the Mara [34] and Athi-Kaputiei [35]. The status and threats  
607 facing the five ecosystems with migratory wildebeest populations in East Africa are  
608 summarized in Table S2.

609

610 **Table 2.** Summary of the processes likely associated with the declining migratory  
611 wildebeest populations and patterns in the East African rangelands.

| Processes | ‡Serengeti-<br>Mara | Masai<br>Mara | Athi-<br>Kaputiei | Greater<br>Amboseli | Tarangire-<br>Manyara |
|-----------|---------------------|---------------|-------------------|---------------------|-----------------------|
|-----------|---------------------|---------------|-------------------|---------------------|-----------------------|

| <b>Direct interferences/causes</b>                        |     |     |     |     |     |
|-----------------------------------------------------------|-----|-----|-----|-----|-----|
| Agricultural encroachment                                 | -   | +++ | +   | +++ | +++ |
| Fencing                                                   | -   | ++  | +++ | ++  | -   |
| Settlements                                               | +   | ++  | +++ | ++  | ++  |
| Urbanization                                              | -   | +   | +++ | -   | -   |
| Roads & Infrastructural developments                      | +   | ++  | +++ | +   | ++  |
| Poaching by increasing human populations                  | ++  | +   | ++  | +   | ++  |
| Competition with livestock for forage,<br>water and space | +   | +++ | +++ | +++ | +++ |
| Declining drinking water supply and<br>quality            | +   | ++  | +++ | ++  | +   |
| <b>Drivers</b>                                            |     |     |     |     |     |
| Human population increase                                 | +   | ++  | +++ | ++  | +++ |
| Land tenure change                                        | +   | ++  | +++ | +++ | +   |
| Land subdivision                                          | -   | +++ | +++ | ++  | ++  |
| Settlement policies                                       | ++  |     | +++ |     | +++ |
| Wildlife conservation and management<br>policies          | +++ | +++ | +++ | +++ | +++ |
| Wildlife management institutions                          | -   | +++ | +++ | ++  | ++  |
| Wildlife markets or benefits to landowners                | -   | +++ | +++ | +++ | +   |

612 ‡+++ High importance; ++ Important; + less importance; - not important. Source: Interviews with

613 resident researchers [4,5,15,18,111].

614

615 Additional factors that adversely affect access of migratory wildebeest to critical

616 habitats, food and water include human population expansion, land subdivision and

617 privatization of land tenure, development of urban centres and intensification of land

618 use following sedentarization of formerly semi-nomadic pastoralists [4,26,31,33-35].

619

620 Why is the Serengeti-Mara wildebeest population stable while the other populations  
621 are declining? Moreover, given that the Serengeti-Mara ecosystem protects nearly 1.5  
622 million wildebeest, why should we worry about conserving the other smaller  
623 wildebeest populations? First, the Serengeti-Mara populations are not declining  
624 because over 80% of the wildebeest live in the large and relatively well-protected  
625 ecosystem. Second, it is important to conserve the smaller populations in other areas  
626 for at least three reasons. a) Some of the other areas support populations of wildebeest  
627 belonging to a different subspecies from that found in Serengeti-Mara. b) Migratory  
628 wildebeest provide important ecosystem services, even at low densities, such as  
629 promoting calf survival among other ungulate species by reducing predation pressure  
630 when present in an area [112]. c) Wildebeest migrations are a magnificent spectacle  
631 and thus can provide significant tourism revenue opportunities in specific areas.

632

### 633 **Land-use change and poaching as causes of wildebeest population declines**

634 Land use change, particularly expansion of agriculture, settlements and fences and  
635 commercial charcoal production linked to human population growth degrade and  
636 reduce wildlife habitats [5,26]. In the Athi-Kaputiei ecosystem, expansion of the  
637 neighbouring Nairobi Metropolis, urbanization in the ecosystem plus relatively lower  
638 land prices compared with Nairobi, strongly drive land use change [114].

639 Development of new industries, businesses and infrastructure attract more people  
640 from Nairobi and elsewhere to the Athi-Kaputiei [4,83]. In Amboseli and Western  
641 Kajiado, commercial charcoal production is causing widespread deforestation of  
642 wildlife habitats [115].

643

644 Agriculture, particularly large-scale commercial cultivation, is a leading cause of  
645 habitat loss for the migratory wildebeest. Previously, mainly outsiders practiced  
646 cropped agriculture in the study ecosystems, but the Masai have recently started  
647 cultivating next to their settlements [116,117]. Widespread adoption of subsistence  
648 agriculture in small plots right around a household's compound can threaten  
649 wildebeest populations migrating outside protected areas [118]. Remarkably, nearly  
650 500 km<sup>2</sup> of natural vegetation in the Loita Plains were converted to wheat farms and  
651 other uses between 1975 and 1995 [67] and even more has been converted in recent  
652 years [119,120]. In Tanzania, people moved into, and cultivated for several years,  
653 parts of Game Controlled Areas or Open Areas, such as the LGCA, which had  
654 functioned much like game reserves in the past, interfering with wildlife migrations.

655

656 In the Tarangire-Manyara ecosystem, about 710 km<sup>2</sup> of land was converted from  
657 rangelands to farms between 1984 and 2000 [15], cutting-off large portions of forage  
658 and dispersal areas and blocking routes traditionally used by migratory wildebeest.  
659 Villagization promoted by government settlement policies in Tanzania is another key  
660 driver of land conversion to agriculture in the Tarangire-Manyara ecosystem [15] and  
661 western Serengeti [14].

662

663 Wildebeest prefer land suitable for agriculture [121] and therefore face a high risk of  
664 displacement by agriculture and competition with livestock for space, forage and  
665 water in pastoral lands. Such high potential lands tend to generate higher economic  
666 returns from cropping than from livestock or conservation [114,119]. Land users are  
667 thus likely to opt for cultivation rather than conservation thereby accentuating

668 encroachment of agriculture and wildebeest population declines. But once land is  
669 cultivated, it is difficult to restore to its former rangeland status where returns from  
670 agriculture overwhelm those from either livestock or wildlife [119]. Even where  
671 wildlife tourism benefits are competitive with those from agriculture, the benefits  
672 often accrue to the rich so that the poor land owners, who bear the burden of  
673 supporting wildlife on their lands, typically receive meagre benefits [122]. This calls  
674 for schemes for more equitable sharing of wildlife benefits [116].

675

676 Land tenure change from group ranches to private ownership is another important  
677 driver of land use change in Masailand in Kenya [116]. The land sub-divisions and  
678 individualization of tenure associated with fencing in Masai Mara, Athi-Kaputiei and  
679 Amboseli ecosystems amplify habitat fragmentation and interfere with the migratory  
680 wildebeest [4,5,123].

681

682 Poaching is associated with increasing human population size and resource use  
683 intensity [108-110]. On commercial wheat farms in the Mara, poaching is very  
684 common (R. Lamprey, pers comm), especially far from pastoral settlements, because  
685 pastoralists often discourage poaching. Poaching is also common inside the protected  
686 areas in the Mara and Serengeti [34,109,110]. In the Athi-Kaputiei, poachers killed  
687 many wildebeest by running them up against fences [35].

### 688 **Ways to make land use compatible with wildlife conservation**

689 Human population explosion, unplanned urbanization, settlements, cultivation and  
690 other developments pose unprecedented challenges to conservation and maintenance  
691 of migrations as the spaces available for wildlife and their habitats shrink, leading to

692 population declines. It is thus important to conserve spatially extensive migratory  
693 systems while balancing human and wildlife needs. In Kenya, wildlife conservancies  
694 are expanding conservation areas for wildlife beyond the state-owned parks and  
695 reserves onto land owned privately by local communities or individuals who benefit  
696 by receiving land rents and job opportunities [34,113].

697

698 It is primarily tourism income that pays for conservancy land leases and management  
699 in Kenya. Thus, the success of the common conservancy model in Kenya is  
700 contingent upon sustainable wildlife tourism making it worthwhile for landowners to  
701 allow conservancies to be set up on their lands. This conservancy model can thus only  
702 be viable in areas with low tourism potential if tourism revenue is supplemented with  
703 other revenue streams.

704

705 Nevertheless, wildebeest can and do benefit from community-based wildlife  
706 conservation endeavours where wildlife conservancies have been established on  
707 private and communal rangelands, including in areas of high rainfall [14,25,124,125].  
708 By 2015, 178 wildlife or mixed livestock-wildlife conservancies had been established  
709 across Kenya [51] and new ones continue to be established on private and communal  
710 lands in Masai Mara, Amboseli, Athi-Kaputiei and Machakos (Tables S3 and S4),  
711 Naivasha-Nakuru and other parts of Kenya [26,34,77,125,126]. The total area of  
712 wildlife conservancies and ranches in Kenya's rangeland counties by 2017 was  
713 54,265 km<sup>2</sup> of which Narok, Kajiado and Machakos counties that support wildebeest  
714 populations had set aside 2,219, 2,837 and 463 km<sup>2</sup>, respectively (KWCA,  
715 Unpublished data, <https://kwcakenya.com/>).

716 What makes the conservancies so popular with local communities is that they also  
717 protect land rights; create jobs; provide income to communities through tourism; and  
718 provide increased security for people, livestock and wildlife [51]. Conservancies are  
719 crucial for wildlife conservation because all state protected areas cover only about  
720 10% of Kenya's land surface (an additional 10.7% is in conservancies, benefiting  
721 close to 700,000 people nationally) and 70% of these areas are found in the  
722 rangelands of Kenya. Moreover, about 65% of Kenya's wildlife are found outside the  
723 protected areas [127]. As limited public land constrains expansion of public protected  
724 areas, the private and communal conservancies are crucial for expanding the space for  
725 wildlife in Kenya. The conservancies are promoting positive attitudes towards  
726 wildlife and restoration of degraded rangelands by regulating livestock grazing,  
727 restricting settlements and other developments. They act as buffers for parks and  
728 reserves, besides offering increased protection to wildlife, enabling many wildlife  
729 species to increase within conservancies [77,126,128].

730

731 Effective wildlife conservation would require permanent conservancies, land  
732 purchases or conservation easements on land used by wildlife. In the Kenya wildlife  
733 conservancies, landowners typically amalgamate adjacent individual plots to create  
734 large, viable game viewing areas. They then broker land lease agreements with a  
735 coalition of commercial tourism operators under institutional arrangements modelled  
736 in the form of payments for ecosystem services [125]. There is a strong interest in this  
737 wildlife conservancy model in Kenya. Thus, starting with only two conservancies in  
738 2005-2006 covering 145.76 km<sup>2</sup>, there were eight conservancies covering about 1000  
739 km<sup>2</sup> by 2010 [125] and 10 conservancies by 2016 (Table S3). The Mara conservancies  
740 covered 1355 km<sup>2</sup> by 2018 and are expanding rapidly. The development of the Mara



741 conservancies has helped partially unblock the movements of migratory wildebeest  
742 between the Mara Reserve and the Loita Plains.

743

744 In certain areas, such as the Athi-Kaputiei, land owners are paid conservation land  
745 lease fees since 2000 to keep land open for use by wildlife and livestock, not building  
746 fences and for collecting poachers' snares [35,129-131]. The cost of financing such  
747 land leases over large areas year after year would, however, require creating  
748 conservancies able to maintain viable conservation enterprises, such as a vibrant  
749 tourism industry, to ensure their long-term sustainability. The benefits derived from  
750 such enterprises would be an important incentive for the landowners to continue  
751 keeping their land open for use by wildlife and desisting from other uses incongruent  
752 with conservation. The changes taking place in Athi-Kaputiei are, however, so  
753 dramatic and fast that unless these conservation efforts are undertaken immediately,  
754 the opportunity to save even the very few remaining and most critical portions of this  
755 once magnificent ecosystem, is highly likely to be lost for good.

756

757 In Tanzania, various conservation initiatives have been launched to protect the  
758 remaining migratory routes and dispersal ranges beyond the borders of protected  
759 areas. These include reducing illegal hunting and livestock grazing in Manyara  
760 Ranch, recently converted to a private Conservancy. Provision of artificial water holes  
761 in the Manyara Ranch Conservancy keeps migratory wildebeest and zebra in the  
762 vicinity of the Conservancy until late in the dry season. On the communal grazing  
763 lands, initiatives have been launched to enhance the wildlife benefits going to the  
764 local communities. In Simanjiro Plains, hunting companies, tour operators and

765 conservation organizations have teamed up together to pay for conservation land lease  
766 fees to community members to refrain from farming or expanding settlements into  
767 critical areas of communal grazing lands [132]. Certificate of Customary Right of  
768 Occupancy (CCRO) agreements are also being used to protect grazing ranges for  
769 wildlife and pastoral livestock, including in areas neighbouring migratory corridors.  
770 One such CCRO was established in Selela Village situated north of Manyara and  
771 includes an important but narrow corridor [133]. Other initiatives include  
772 establishment of Wildlife Management Areas (WMAs) two of which were recently  
773 established to the north and west of Tarangire National Park [18]. The WMAs not  
774 only protect communal land but also reduce the incentive for poaching by distributing  
775 tourism revenue to the local communities. The Tarangire National Park and the  
776 Tanzania Wildlife Authority are also supporting community game rangers to intensify  
777 anti-poaching patrols in the WMAs and Manyara Ranch Conservancy and among  
778 villages in the Simanjiro Plains.

779

780 **Wildlife conservation initiatives and gaps in wildlife policies, institutions and**  
781 **markets in Kenya and Tanzania**

782 What else can be done to stop the declines and allow migratory wildebeest access to  
783 at least the few remaining critical portions of their former habitats? A significant  
784 challenge to wildlife conservation in East Africa remains incoherent government  
785 development policies that promote incompatible land uses, such as promoting  
786 cultivation in pastoral rangelands occupied by wildlife to combat food insecurity  
787 while also promoting wildlife-based tourism in the same areas. Such policies should  
788 be harmonised to minimize the adverse impacts on wildlife conservation of  
789 incongruent land uses in pastoral rangelands. Another weakness of the wildlife policy

790 in Kenya is that the state owns all wildlife whereas land owners in the rangelands do  
791 not have access to or user rights over wildlife. The land owners do not get any  
792 compensation for the opportunity cost of supporting wildlife on their private lands nor  
793 for wildlife damage to their private property, thus fuelling indifference or hostility  
794 towards wildlife. There is also no public institution specifically charged with  
795 conserving and managing wildlife on the private lands. Although these shortcomings  
796 are well documented [114,134] and have partly been addressed by the Wildlife  
797 Conservation and Management Act 2013 [135] and the National Wildlife Strategy  
798 [136], the Act should be fully implemented to address these glaring policy,  
799 institutional and market deficiencies.

800

801 In Tanzania, several national initiatives are being undertaken to restructure the  
802 institutions that manage the wildlife sector in order to contain a spiralling poaching  
803 crisis. Key among these is the dissolution of the former Wildlife Division (WD) that  
804 used to manage all the Game Reserves and Game Controlled Areas, including  
805 overseeing all wildlife in village lands (i.e., WMAs), and its reconstitution as the  
806 Tanzania Wildlife Authority (TAWA) in October 2015. TAWA is empowered and  
807 better funded compared with its predecessor, the WD, to improve the management of  
808 the wildlife areas under its jurisdiction.

809 The second is the re-organization of the entire wildlife sector in the country into para-  
810 military style organizations to intensify the fight against run-away poaching in  
811 protected and unprotected areas, most especially in game reserves. Because many game  
812 reserves and game controlled areas share open borders with national parks, wildlife  
813 population declines due to poaching are occurring even inside the national parks. But,  
814 to be successful in curbing poaching, these efforts should be accompanied with

815 enhanced economic incentives to communities neighbouring wildlife areas or sharing  
816 land with wildlife to discourage poaching and destruction of wildlife habitats. Tanzania  
817 is also working on expanding the Serengeti National Park by adding to it about 1500  
818 km<sup>2</sup> from the Loliondo Game Controlled Area to the east and extending the western  
819 side of the park to reach the shores of Lake Victoria.

820

821 A major initiative in both Tanzania and Kenya is the development of national policies  
822 on wildlife corridors, dispersal areas, buffer zones and migratory routes to promote  
823 habitat connectivity [137,138]. Regional initiatives linking the two countries are,  
824 however, needed to foster close cooperation between Kenya and Tanzania in  
825 conserving the trans-boundary wildebeest migrations and implementing regional and  
826 international conservation conventions and treaties. Such initiatives should include  
827 harmonization of policies, legal and regulatory frameworks for the conservation of  
828 wildlife and other species involved in trans-boundary migrations.

829

### 830 **Conclusions**

831 Migratory wildebeest populations in four out of five key ecosystems in East Africa  
832 are under severe threats and two populations are on their way to total collapse if the  
833 trends are left to continue unabated. Such collapse in migratory wildlife population in  
834 East Africa has been documented for zebra and Thomson's gazelle populations that  
835 used to migrate between Lakes Nakuru and Elementaita and Baringo regions of  
836 Kenya [76,77,139] that went extinct because of fences and uncontrolled shooting [85].  
837 The migration of the Athi-Kaputiei wildebeest to Nairobi National Park had also  
838 virtually collapsed by 2011 [35]. Recent surveys in the park show that the wildebeest

839 involved in this migration remained under 350 animals from 2012 to 2015 [5].  
840 Agricultural encroachment, settlements, poaching, roads and fencing are the major  
841 proximate threats responsible for the extreme wildebeest losses and degradation of  
842 their habitats as they directly kill, displace, or reduce wildebeest access to forage,  
843 water and calving areas. The fundamental causes of wildebeest population declines  
844 seem to be expanding unplanned land use developments driven by human population  
845 growth; poaching, policy, institutional and market deficiencies. Consequently, the  
846 Kenyan and Tanzanian governments need to strongly promote and lead the  
847 conservation of the remaining key wildebeest habitats, migration corridors and  
848 populations to ensure their continued access to grazing resources in these rangelands.  
849 More wildlife conservancies or management areas should be established to protect  
850 migratory routes or corridors, buffer zones, dispersal areas and calving grounds for  
851 the species. Land use and development planning should be enhanced and gaps in  
852 wildlife policies, institutions and markets addressed. Where migration occurs across  
853 international boundaries, such as in the Serengeti-Mara, Loita Plains and Amboseli  
854 ecosystems, wildlife policies, land use plans, conservation and management goals  
855 should be harmonized to ensure the long-term survival of migratory species and the  
856 sustainability of the rangelands upon which they depend. All areas currently under  
857 protection should ideally have binding legal restrictions on future developments to  
858 minimize their vulnerability to future changes. The various conservation initiatives  
859 should be coordinated spatially and across bureaucratic lines to enhance their  
860 effectiveness.

861

862 **Acknowledgements**

863 We thank the Tanzania Wildlife Research Institute (TAWIRI) and the Directorate of  
864 Resource Surveys and Remote Sensing of Kenya (DRSRS) for permission to use their  
865 aerial survey data. JOO was supported by a grant from the German National Research  
866 Foundation (DFG; Grant # OG 83/1-1). MYS was supported by the Pathways to  
867 Resilience in Semi-Arid Economies (PRISE, Project # 107643-001). This project has  
868 received funding from the European Union's Horizon 2020 research and innovation  
869 programme under grant agreement No 641918 through the AfricanBioservices  
870 Project. National Science Foundation (NSF) DEB Grant #0919383) supported this  
871 work through the project: Wildebeest Forage Acquisition in Fragmented Landscapes  
872 under Variable Climates.

873

#### 874 **References**

875 **1.** Bolger DT, Newmark WD, Morrison TA, Doak DF (2008) The need for integrative  
876 approaches to understand and conserve migratory ungulates. *Ecology Letters* 11: 63-  
877 77.

878

879 **2.** Harris G, Thirgood S, Hopcraft JGC, Cromsigt JPG, Berger J (2009) Global decline  
880 in aggregated migrations of large terrestrial mammals. *Endangered Species Research*  
881 7: 55-76.

882

883 **3.** Berger J (2004) The Last Mile: How to sustain long-distance migrations in  
884 mammals. *Conservation Biology* 18: 320-331.

885

886 **4.** Reid RS, Gichohi H, Said MY, Nkedianye D, Ogutu JO, Kshatriya M, Kristjanson  
887 P, Kifugo SC, Agatsiva JL, Andanje SA, Bagine R (2008) Fragmentation of a peri-

- 888 urban savanna, Athi-Kaputiei plains, Kenya. In: Fragmentation in Semi-arid and Arid  
889 Landscapes; Consequences for Human and Natural Systems (eds KA Galvin, RS Reid,  
890 RH Behnke, NT Hobbs), pp. 195-224. Springer.
- 891
- 892 **5.** Said MY, Ogutu JO, Kifugo SC, Makui O, Reid RS, de Leeuw J (2016) Effects of  
893 extreme land fragmentation on wildlife and livestock population abundance and  
894 distribution. *Journal of Nature Conservation* 34: 151-164.
- 895
- 896 **6.** Fryxell JM, Greever J, Sinclair ARE (1988) Why are migratory ungulates so  
897 abundant? *American Naturalist* 131: 781-98.
- 898
- 899 **7.** Hopcraft JGC, Holdo RM, Mwangomo E, Mduma SAR, Thirgood SJ, Borner M,  
900 Sinclair ARE (2015) Why are wildebeest the most abundant herbivore in the  
901 Serengeti ecosystem? *Serengeti IV: sustaining biodiversity in a coupled human-*  
902 *natural system*, 125.
- 903
- 904 **8.** Sinclair ARE (1995) Serengeti past and present. Pp. 3-30 In: *Serengeti II*. Sinclair,  
905 ARE Arcese P (Eds). Chicago University Press, Chicago.
- 906
- 907 **9.** Ottichilo WK, de Leeuw J, Prins HHT (2001) Population trends of resident  
908 wildebeest *Connochaetes taurinus hecki* (Neumann) and factors influencing them in  
909 the Masai Mara ecosystem, Kenya. *Biological Conservation* 97: 271-282.
- 910
- 911 **10.** Serneels S, Lambin EF (2001). Proximate causes of land-use change in Narok

- 912 District, Kenya: a spatial statistical model. *Agriculture, Ecosystems Environment* 85:  
913 65-81.  
914
- 915 **11.** Wolanski E, Gereta E, Borner M, Mduma SAR (1999) Water, migration and the  
916 Serengeti ecosystem. *American Scientist* 87: 523-526.  
917
- 918 **12.** McNaughton SJ (1990) Mineral nutrition and seasonal movements of African  
919 migratory ungulates. *Nature* 345: 613-615.  
920
- 921 **13.** Fryxell JM, Sinclair ARE. (1988) Causes and consequences of migration by  
922 large herbivores. *Trends in Ecology and Evolution* 9: 237-241.  
923
- 924 **14.** Thirgood S, Mosser A, Tham S, Hopcraft JGC, Mwangomo E, Mlengeya T,  
925 Kilewo M, Fryxell J, Sinclair ARE, Borner M (2004) Can Parksprotect migratory  
926 ungulates? The case of the Serengeti wildebeest. *Animal Conservation* 7: 113-120.  
927
- 928 **15.** Msoffe FU, Kifugo SC, Said MY, Neselle M, van Gardingen P, Reid RS, Ogutu  
929 JO, Herrero M and de Leeuw J (2011) Drivers and impacts of land-use change in the  
930 Masai-Steppe of Northern Tanzania; a ecology-socio-political analysis. *Land Use*  
931 *Science* 6: 261-281.  
932
- 933 **16.** Homewood K, Lambin EF, Kariuki A, Kikula I, Kivelia J, Said MY, Serneels S,  
934 Thompson M (2001) Long-term changes in Serengeti-Mara wildebeest and land  
935 cover: pastoralism, population or policies? *Proceedings of the NationalAcademy of*  
936 *Science* 98: 12544-12549.



937

938 **17.** Morrison TA, Bolger DT (2012) Wet season range fidelity in a tropical migratory  
939 ungulate. *Journal of Animal Ecology* 81: 543-552.

940

941 **18.** Morrison TA, Link WA, Newmark WD, Foley CA, Bolger DT (2016) Tarangire  
942 revisited: Consequences of declining connectivity in a tropical ungulate population.  
943 *Biological Conservation* 197: 53-60.

944

945 **19.** Foley C, Foley L (2015) Wildlife trends and status of migratory corridors in the  
946 Tarangire Ecosystem, Ed. TP Wildlife Conservation Society, Arusha.

947

948 **20.** Bedelian C, Nkedianye, D, Herrero M (2007) Masai perception of the impact and  
949 incidence of malignant catarrhal fever (MCF) in southern Kenya. *Preventive*  
950 *Veterinary Medicine* 78: 296-316.

951

952 **21.** Reid RS (2012) *Savannas of our birth: People, wildlife, and change in East Africa.*  
953 Univ of California Press, Berkeley, CA.

954

955 **22.** Estes RD, East R (2009) Status of the wildebeest (*Connochaetes taurinus*) in  
956 the wild 1967-2005. Wildlife Conservation Society.

957

958 **23.** Pennycuik L (1975) Movements of the migratory wildebeest population in the  
959 Serengeti area between 1960 and 1973. *African Journal of Ecology* 13: 65-87.

960

- 961 **24.** Western D (1975) Water availability and its influence on the structure and  
962 dynamics of a savannah large mammal community. *African Journal of Ecology* 13:  
963 265-286.  
964
- 965 **25.** Western D (1982) Amboseli National Park: Enlisting Landowners to Conserve  
966 Migratory Wildlife. *Ambio* 5: 302-305.  
967
- 968 **26.** Ogutu JO, Piepho H-P, Said MY, Kifugo SC (2014) Herbivore Dynamics and  
969 Range Contraction in Kajiado County Kenya: Climate and Land Use Changes,  
970 Population Pressures, Governance, Policy and Human-wildlife Conflicts. *Open*  
971 *Ecology Journal* 7: 9-31.  
972
- 973 **27.** Lamprey HF (1964) Estimation of large mammal densities, biomass and energy  
974 exchange in the Tarangire Game Reserve and the Masai Steppe inTanganyika. *East*  
975 *African Journal of Ecology* 2: 1-46.  
976
- 977 **28.** Borner M (1985) The Increasing Isolation of Tarangire National Park. *Oryx* 19:  
978 91-96.  
979
- 980 **29.** Kahurananga J, Silkilwasha, F (1997) The migration of zebra and wildebeest  
981 between Tarangire National Park and Simanjiro Plains, northern Tanzania, in 1972  
982 and recent trends. *African Journal of Ecology* 35: 179-185.  
983
- 984 **30.** OIKOS (2002) Analysis of Migratory movements of large mammals and their

985 interactions with human activities in the Tarangire area Tanzania, as a contribution  
986 and sustainable development strategy: Tarangire-Manyara Conservation Project  
987 (TCMP) Final Project Report. Istituto Oikos and University of Milan, Italy in  
988 collaboration with Tanzania National Parks.

989

990 **31.** Ogutu JO, Owen-Smith N, Piepho H-P, Said MY (2011) Continuing wildlife  
991 population declines and range contraction in the Mara region of Kenya during  
992 1977-2009. *Journal of Zoology* 285: 99-109.

993

994 **32.** Veldhuis MP, Ritchie ME, Ogutu JO, Beale C, Estes A, Hopcraft JGC, Morrison  
995 TA, Mwakilema W, Ojwang GO, Parr CL, Probert J, Wargute PW, Olf H (2019) The  
996 Serengeti squeeze: cross-boundary human impacts compromise an iconic protected  
997 ecosystem. *Science* (In Revision).

998

999 **33.** Ogutu JO, Piepho H-P, Said MY, Ojwang GO, Njino LW, Wargute PW, Kifugo  
1000 SC (2016) Extreme wildlife declines and concurrent increase in livestock numbers in  
1001 Kenya: What are the causes? *PLoS ONE* 10(8): e0133744.

1002 doi:10.1371/journal.pone.0133744.

1003

1004 **34.** Ogutu JO, Piepho H-P, Dublin HT, Bhola N, Reid RS (2009) Dynamics of Mara-  
1005 Serengeti ungulates in relation to land use changes. *Journal of Zoology* 278: 1-14.

1006

1007 **35.** Ogutu JO, Owen-Smith N, Piepho H-N, Said MY, Kifugo SC, Reid RS, Gichohi  
1008 H, Kahumbu P, Andanje S (2013) Changing Wildlife Populations in Nairobi National

- 1009 Park and Adjoining Athi-Kaputiei Plains: Collapse of the Migratory Wildebeest. Open  
1010 Conservation Biology Journal 7: 11-26.  
1011
- 1012 **36.** Msoffe FU, Said MY, Ogutu JO, Kifugo SC, de Leeuw J, van Gardingen P, Reid  
1013 RS (2011) Spatial correlates of land-use changes in the Masai-Steppe of Tanzania:  
1014 Implications for conservation and environmental planning. International Journal of  
1015 Biodiversity Conservation 3: 280-290.  
1016
- 1017 **37.** Tarangire Conservation Project (TCP) (1997) Analysis of migratory movements  
1018 of large mammals and their interactions with human activities in the Tarangire area,  
1019 Tanzania, as a contribution to a conservation and sustainable development strategy.  
1020 Final report, pp.217. University of Milan and Instituto Oikos, Italy, in collaboration  
1021 with Tanzania National Parks (TANAPA).  
1022
- 1023 **38.** Lamprey HF (1963) on the ecological separation of the large mammal species in  
1024 the Tarangire Game Reserve, Tanganyika. East African Wildlife Journal 1: 63-92.  
1025
- 1026 **39.** Msoffe F U, Mturi FA, Galanti V, Tosi W, Wauters LA, Tosi G (2007)  
1027 Comparing data of different survey methods for sustainable wildlife management in  
1028 hunting areas: the case of Tarangire–Manyara ecosystem, northern Tanzania.  
1029 European Journal of Wildlife Research 53: 112-124.  
1030
- 1031 **40.** Norton-Griffiths M (1978) Counting Animals. A series of handbooks on  
1032 techniques currently used in African Wildlife ecology. Hand book No.1; Second  
1033 Edition, African wildlife Foundation, Nairobi, Kenya.

1034

1035 **41.** Grunblatt L, Said MY, Warugute R (1996) National Rangeland Report. Summary  
1036 of population estimates of wildlife and livestock. DRSRS. Nairobi, Kenya, Ministry  
1037 of Planning and National Development .

1038

1039 **42.** Woodworth B, Farm B (1996) Tanzania Wildlife Conservation Monitoring:  
1040 Procedure Manual. Frankfurt Zoological Society, Arusha, Tanzania.

1041

1042 **43.** Stewart DRM, Zaphiro DRP (1963) Biomass and density of wild herbivores in  
1043 different East African habitats. *Mammalia* 27: 483-496.

1044

1045 **44.** Pearsall MH (1957) Report on an Ecological Survey of the Serengeti National  
1046 Park Tanganyika. *Oryx* 4: 71-136.

1047

1048 **45.** Darling (1960) An ecological reconnaissance of the Mara Plains in Kenya Colony.  
1049 *Wildlife Monographs* 5, 41pp.

1050

1051 **46.** Talbot LM, Talbot MH (1963) The wildebeest in western Masailand, East Africa.  
1052 *Wildlife Monographs* 12, 88p.

1053

1054 **47.** Western D, Nightingale DLM (2003) Environmental change on the vulnerability  
1055 of pastoralists to drought: the Masai in Amboseli, Kenya. In: *Africa Environmental*  
1056 *Outlook: Human Vulnerability to Environmental Change*. Earthprint on behalf of the  
1057 United Nations Environmental Program. London.

1058 Available at: [http://oceandocs.net/bitstream/1834/436/1/Amboseli\\_Masai.pdf](http://oceandocs.net/bitstream/1834/436/1/Amboseli_Masai.pdf)

1059

1060 **48.** Africover land classification. Available at <http://www.fao.org/3/a-bd854e.pdf>

1061

1062 **49.** Okello MM, D'amour DE (2008) Agricultural expansion within Kimanaelectric  
1063 fences and implications for natural resource conservation around Amboseli National  
1064 Park, Kenya. *Journal of Arid Environments* 72: 2179-2192.

1065

1066 **50.** Okello MM (2009) Contraction of wildlife dispersal area and displacement by  
1067 human activities in Kimana Group Ranch near Amboseli National Park, Kenya. *Open*  
1068 *Conservation Biology Journal* 3: 49-56.

1069

1070 **51.** Reid RS, Kaelo D, Galvin KA, Harmon R (2016) Pastoral Wildlife Conservancies  
1071 in Kenya: A Bottom-up Revolution in Conservation, Balancing Livelihoods and  
1072 Conservation? *Proceedings of the International Rangelands Congress* 18-22 July  
1073 2016, Saskatoon, Canada.

1074

1075 **52.** Lamprey RH, Reid RS (2004) Expansion of human settlement in Kenya's Masai  
1076 Mara: what future for pastoralism and wildlife?. *Journal of Biogeography* 31:997-  
1077 1032.

1078

1079 **53.** Ogutu JO, Piepho HP, Reid RS, Rainy ME, Kruska RL, Worden JS, Hobbs NT  
1080 (2010) Large herbivore responses to water and settlements in savannas. *Ecological*  
1081 *Monographs* 80: 241-266.

1082

- 1083 **54.** Ogutu JO, Reid RS, Piepho H-P, Hobbs NT, Rainy ME, Kruska RL, Nyabenge M  
1084 (2014). Large herbivore responses to surface water and land use in an East African  
1085 savanna: implications for conservation and human- wildlife conflicts. *Biodiversity*  
1086 *and Conservation* 23: 573-596.
- 1087
- 1088 **55.** Jolly GM (1969) Sampling methods for aerial censuses of wildlife populations.  
1089 *East African Agricultural and Forestry Journal* 34(sup1): 46-49.
- 1090
- 1091 **56.** Burnham KP, Anderson DR (2002) Model selection and multimodel inference: a  
1092 practical information-theoretic approach. Springer Science and Business Media.
- 1093
- 1094 **57.** SAS Institute Inc (2018) SAS system for windows. Cary, North Carolina, USA.
- 1095
- 1096 **58.** Stelfox JG, Peden DG, Epp H, Hudson RJ, Mbugua SW, Agastiva JL, Amuyunzu  
1097 C L (1986) Herbivore Dynamics in Southern Narok, Kenya. *Journal of Wildlife*  
1098 *Management* 50: 339-347.
- 1099
- 1100 **59.** Maddock L (1979) The “migration” and grazing succession. Pp. 104-129 In: ARE  
1101 Sinclair, M Norton-Griffiths (1979), University of Chicago Press, Chicago, USA.
- 1102
- 1103 **60.** Hopcraft JGC, Morales J, Beyer H, Borner M, Mwangomo E, Sinclair ARE, Olf  
1104 H, Haydon D (2014) Competition, predation, and migration: individual choice  
1105 patterns of Serengeti migrants captured by hierarchical models. *Ecological*  
1106 *Monographs* 84: 355–372.
- 1107

- 1108 **61.** Sinclair ARE (1973) Population increases of buffalo and wildebeest in the  
1109 Serengeti. *African Journal of Ecology* 11: 93-107.  
1110
- 1111 **62.** Sinclair ARE, Norton-Griffiths M (1982) Does competition or facilitation regulate  
1112 ungulate populations in the Serengeti? A test of hypotheses. *Oecologia*. 53: 364-369.  
1113
- 1114 **63.** Sidney J (1965) The past and present distribution of some African ungulates.  
1115 *Transactions of the Zoological Society of London* 30: 1-396.  
1116
- 1117 **64.** Jenkins P (2001) Wildlife use in World War II. In: *An impossible dream, some of*  
1118 *Kenya's last colonial wardens recall the game department in the closing years of the*  
1119 *British Empire*, Pages 39-41, eds, I Parker and S Bleazard. Librario Publishing  
1120 Limited.  
1121
- 1122 **65.** Talbot LM, Stewart DRM (1964) First wildlife census of the entire Serengeti-  
1123 Mara Region, East Africa. *Journal of Wildlife Management* 28: 815-827.  
1124
- 1125 **66.** Talbot LM, Talbot MH (1961) Preliminary observations on the population  
1126 dynamics of wildebeest in Narok District, Kenya. *East African Agricultural and*  
1127 *Forestry Journal* 27: 108-116.  
1128
- 1129 **67.** Simon N (1962) *Between the sunlight and the Thunder: The Wild Life of Kenya*.  
1130 London: Collins.  
1131
- 1132 **68.** Serneels S, Lambin EF (2001) Impacts of Land-use changes on the wildebeest



- 1133 migration in the northern part of the Serengeti-Mara ecosystem. Journal of  
1134 Biogeography 28: 391-407.  
1135  
1136 **69.** Thomson J (1885) Through Masailand. Samson Low, Marston, Searle and  
1137 Rivington, London.  
1138  
1139 **70.** Game Report (GAR) (1907) Game Annual Report 1906-07. Kenya National  
1140 Archives.  
1141  
1142 **71.** Game Report (GAR) (1910) Game Report and lists of game killed 1909-1910.  
1143 Kenya National Archives.  
1144  
1145 **72.** Heller E (1913) The white rhinoceros. Smithsonian Miscellaneous Collections 61:  
1146 1-77.  
1147  
1148 **73.** Roosevelt T, Heller E (1914) Life Histories of African Game Animals. Charles  
1149 Scribner's Sons, New York.  
1150  
1151 **74.** Meinertzhagen R (1957) Kenya Diary (1902-1906). Edinburgh: Oliver and Boyd.  
1152  
1153 **75.** Stewart DRM, Stewart J (1963) The distribution of some large mammals in  
1154 Kenya. Journal of East African Natural History Society 24:1-52.  
1155  
1156 **76.** Percival AB (1928) A game Ranger on Safari. Nesbit Co Ltd, London.  
1157

- 1158 **77.** Ogutu JO, Kuloba B, Piepho H-P, Kanga E (2017) Wildlife population dynamics  
1159 in human-dominated landscapes under community-based conservation: Example of  
1160 Nakuru Wildlife Conservancy, Kenya. PLoS One 12(1), e0169730.  
1161
- 1162 **78.** Estes RD, Atwood JL, Estes AB (2006) Downward trends in Ngorongoro Crater  
1163 ungulate populations 1986–2005: Conservation concerns and the need for ecological  
1164 research. Biological Conservation 131: 106-120.  
1165
- 1166 **79.** Oates L, Rees PA (2013) The historical ecology of the large mammal populations  
1167 of Ngorongoro Crater, Tanzania, east Africa. Mammal Review 43: 124-141.  
1168
- 1169 **80.** Foster JB, Kearney D (1967) Nairobi National Park game census, 1966. East  
1170 African Wildlife Journal 5: 112-120.  
1171
- 1172 **81.** Foster JB, Coe MJ (1968) The biomass of game animals in Nairobi National Park,  
1173 1960-66. Journal of Zoology 155: 413-25.  
1174
- 1175 **82.** Gichohi HW (1996) The Ecology of a truncated ecosystem, The Athi-Kapiti  
1176 Plains. PhD Thesis, University of Leicester, Leicester.  
1177
- 1178 **83.** Gichohi H (2000) Functional relationships between parks and agricultural areas in  
1179 East Africa: the case of Nairobi National Park. In: Prins HHT, GrootenhuisJG,  
1180 Thomas TD (Eds.) Wildlife Conservation by Sustainable Use.  
1181
- 1182 **84.** De Beaton KP (1949) A warden's diary. East African Standard.

1183

1184 **85.** Percival AB (1924) A Game Ranger's Note Book. Nisbet, London.

1185

1186 **86.** Hillman JC, Hillman AK (1977) Mortality of wildlife in Nairobi National Park,  
1187 during the drought of 1973–1974. African Journal of Ecology 15: 1-18.

1188

1189 **87.** Simon N (2001) New Directions in the 1950s. In: An impossible dream, some of  
1190 Kenya's last colonial wardens recall the game department in the closing years of the  
1191 British Empire, Pages 83-92, eds, I Parker and S Bleazard. Librario Publishing  
1192 Limited. Kinloss, Scotland.

1193

1194 **88.** Stanley J (2000) The Machakos Wildlife Forum: The story from a woman on the  
1195 land. In Wildlife Conservation by Sustainable Use (pp. 13-20). Springer Netherlands.

1196

1197 **89.** Stabach JA (2015) Movement, resource selection, and the physiological stress  
1198 response of white-bearded wildebeest. PhD Thesis, Colorado State University,  
1199 Fort Collins, USA.

1200

1201 **90.** Sinclair ARE, Dublin H, Borner M (1985) Population regulation of Serengeti  
1202 Wildebeest: a test of the food hypothesis. Oecologia 65: 266-268.

1203

1204 **91.** Mduma SAR, Sinclair ARE, Hilborn R (1999) Food regulates the Serengeti  
1205 wildebeest: a 40-year record. Journal of Animal Ecology 68: 1101-1122.

1206

- 1207 **92.** Hobbs NT, Galvin KA, Stokes CJ, Lockett JM, Ash AJ, Boone RB, Reid RS,  
1208 Thornton PK (2008) Fragmentation of rangelands: Implications for humans, animals,  
1209 and landscapes. *Global Environmental Change* 18:776-785.  
1210
- 1211 **93.** Western D (2007) A half a century of habitat change in Amboseli National Park,  
1212 Kenya. *African Journal of Ecology* 45: 302-310.  
1213
- 1214 **94.** Western D (2007) The ecology and changes of the Amboseli ecosystem.  
1215 Recommendations for planning and conservation. Amboseli Conservation Program  
1216 Report, 53pp. ACC, Nairobi, Kenya.  
1217
- 1218 **95.** Mose VN, Nguyen-Huu T, Western D, Auger P, Nyandwi C (2013) Modelling the  
1219 dynamics of migrations for large herbivore populations in the Amboseli National  
1220 Park, Kenya. *Ecological Modelling* 254: 43-49.  
1221
- 1222 **96.** Andere DK (1981) Wildebeest *Connochaetes taurinus* (Burchell) and its food  
1223 supply in Amboseli Basin. *African Journal of Ecology* 19: 239-250.  
1224
- 1225 **97.** Stabach JA, Wittemyer G, Boone RB, Reid RS, Worden JS (2016) Variation in  
1226 habitat selection by white-bearded wildebeest across different degrees of human  
1227 disturbance. *Ecosphere* 7(8):e01428. 10.1002/ecs2.1428.  
1228
- 1229 **98.** Bholá N, Ogutu JO, Said MY, Olf H (2012) Herbivore hotspots in the Mara  
1230 Region of Kenya in relation to land use. *Journal of Animal Ecology* 81: 1268-1287.  
1231

- 1232 **99.** Morara MK, MacOpiyo L, Kogi-Makau W (2014) Land use, land cover change in  
1233 urban pastoral interface. A case of Kajiado County, Kenya. *Journal of Geography and*  
1234 *Regional Planning* 7: 192-202.
- 1235
- 1236 **100.** Reid RS, Rainy M, Ogutu JO, Kruska RL, Kimani K, Nyabenge M, McCartney  
1237 M, Kshatriya M, Worden J, Ng'ang'a L, Owuor J, Kinoti J, Njuguna E, Wilson CJ,  
1238 Lamprey R (2003) People, wildlife and livestock in the Mara ecosystem: The Mara  
1239 Count 2002. International Livestock Research Institute, Nairobi, Kenya. Available  
1240 online at:  
1241 [https://www.researchgate.net/profile/Joseph\\_Ogutu2/publication/266852551\\_](https://www.researchgate.net/profile/Joseph_Ogutu2/publication/266852551_People_wildlife_and_livestock_in_the_Mara_Ecosystem_the_Mara_Count_2002/links/54508a6d0cf249aa53da977c.pdf)  
1242 [People\\_wildlife\\_and\\_livestock\\_in\\_the\\_Mara\\_Ecosystem\\_the\\_Mara\\_Count\\_20](https://www.researchgate.net/profile/Joseph_Ogutu2/publication/266852551_People_wildlife_and_livestock_in_the_Mara_Ecosystem_the_Mara_Count_2002/links/54508a6d0cf249aa53da977c.pdf)  
1243 [02/links/54508a6d0cf249aa53da977c.pdf](https://www.researchgate.net/profile/Joseph_Ogutu2/publication/266852551_People_wildlife_and_livestock_in_the_Mara_Ecosystem_the_Mara_Count_2002/links/54508a6d0cf249aa53da977c.pdf)
- 1244
- 1245 **101.** Løvschal M, Bøcher PK, Pilgaard J, Amoke I, Odingo A, Thuo A, Svenning JC  
1246 (2017) Fencing bodes a rapid collapse of the unique Greater Mara ecosystem. *Nature*  
1247 *Scientific Reports* 7:41450. DOI: 10.1038/srep41450.
- 1248
- 1249 **102.** Williamson D, Williamson J (1985) Botswana's fences and the depletion of  
1250 Kalahari wildlife. *Oryx* 18: 218-222.
- 1251
- 1252 **103.** Tambling CJ, Du Toit JT (2005) Modelling wildebeest population dynamics:  
1253 implications of predation and harvesting in a closed system. *Journal of Applied*  
1254 *Ecology* 42: 431-441.
- 1255

- 1256 **104.** Western D (2010) The Worst Drought: Tipping point or Turning point. Swara  
1257 2:16-20.  
1258
- 1259 **105.** Jones KE, Patel NG, Levy MA, Storeygard A, Balk D, Gittleman JL, Daszak P  
1260 (2008) Global trends in emerging infectious diseases. *Nature* 451: 990–993.  
1261
- 1262 **106.** Mills JN, Gage KL, Khan AS (2010) Potential influence of climate change on  
1263 vector-borne and zoonotic diseases: a review and proposed research plan.  
1264 *Environmental Health Perspectives* 118:1507-1514.  
1265
- 1266 **107.** Bryony AJ, Grace D, Kock R, Alonso S, Rushton J, Said MY, McKeever D,  
1267 Mutua F, Young J, McDermott J, Pfeiffer DO (2013) Zoonosis emergence linked to  
1268 agricultural intensification and environmental change. *Proceedings of the National*  
1269 *Academy of Science* 110(21): 8399-8404. <http://dx.doi.org/10.1073/pnas.1208059110>  
1270
- 1271 **108.** Mduma SAR, Hilborn R, Sinclair ARE (1998) Limits to exploitation of  
1272 Serengeti wildebeest and implications for its management. Pp 243–265 in *Dynamics*  
1273 *of tropical communities*. Newbury DM, Prins, HHT Brown N (Eds). Oxford:  
1274 Blackwell Science.  
1275
- 1276 **109.** Rentsch D, Packer C (2015) The effect of bushmeat consumption on migratory  
1277 wildlife in the Serengeti ecosystem, Tanzania. *Oryx* 49: 287-294.  
1278

- 1279 **110.** Knapp EJ (2012) Why poaching pays: a summary of risks and benefits illegal  
1280 hunters face in Western Serengeti, Tanzania. *Tropical Conservation Science* 5: 434-  
1281 445.  
1282
- 1283 **111.** Msoffe FU, Ogutu JO, Kaaya J, Bedelian C, Said MY, Kifugo SC, ReidRS,  
1284 Neselle M, van Gardingen P, Thirgood S (2010) Participatory wildlife surveys in  
1285 communal lands: a case study from Simanjiro, Tanzania. *African Journal of Ecology*  
1286 48: 727-735.  
1287
- 1288 **112.** Lee DE, Kissui BM, Kiwango YA, Bond ML (2016) Migratory herds of  
1289 wildebeests and zebras indirectly affect calf survival of giraffes. *Ecology and*  
1290 *Evolution* 6: 8402-8411.  
1291
- 1292 **113.** Bedelian C, Ogutu JO (2017) Trade-offs for climate-resilient pastorallivelihoods  
1293 in wildlife conservancies in the Mara ecosystem, Kenya. *Pastoralism* 7: 10.  
1294
- 1295 **114.** Norton-Griffiths M, Said MY (2010) The future for wildlife on Kenya's  
1296 rangelands: an economic perspective. *Wild Rangelands: Conserving wildlife while*  
1297 *mainting livestock in semi-arid ecosystems*, p. 367-392.  
1298
- 1299 **115.** KWS 2010 Aerial total count: Amboseli – West Kilimanjaro Natron cross border  
1300 landscape, Wet season, March 2010. Available at  
1301 <https://www.kws.go.ke/kws/sites/default/files/Amboseli%20West%20Kilimanjaro%20and%20Magadi%20->  
1302

1303 %20Natron%20Cross%20Border%20Landscape%20March%202010%20Wet%20Sea  
1304 son.pdf.

1305

1306 **116.** Thompson DM, Homewood K (2002) Entrepreneurs, elites and exclusion in  
1307 Masailand: trends in wildlife conservation and pastoral development. *Human Ecology*  
1308 30: 107-138.

1309

1310 **117.** McCabe JT, Leslie PW, DeLuca L (2010) Adopting cultivation to remain  
1311 pastoralists: The diversification of Masai livelihoods in northern Tanzania. *Human*  
1312 *Ecology* 38: 321-334.

1313

1314 **118.** Boone RB, Galvin KA, Thornton PK, Swift DM, Coughenour MB (2006)  
1315 Cultivation and conservation in Ngorongoro conservation area, Tanzania.  
1316 *Human Ecology* 34: 809-828.

1317

1318 **119.** Norton-Griffiths M, Said MY, Serneels S, Kaelo DS, Coughenour M, Lamprey  
1319 RH, Thompson DM, Reid RS (2008) Land use economics in the Mara Area of the  
1320 Serengeti Ecosystem. Pp. 379-416In: *Serengeti III: The future of an ecosystem*, Eds  
1321 ARE Sinclair, C Packer, SAR Mduma, JM Fryxell. University of Chicago Press.

1322

1323 **120.** Mundia NC, Murayama Y (2009) Analysis of land use/cover changes and animal  
1324 population dynamics in a wildlife sanctuary in East Africa. *Remote Sensing* 1: 952-  
1325 970.

1326



- 1327 **121.** Norton-Griffiths M (1996) Property rights and the marginal wildebeest: An  
1328 economic analysis of wildlife conservation options in Kenya. *Biodiversity and*  
1329 *Conservation* 5: 1557-1577.  
1330
- 1331 **122.** Homewood K (2009) Policy and practice in Kenya rangelands: Impacts on  
1332 livelihoods and wildlife. Pages 335-367 in K Homewood, P Kristjanson, PC Trench,  
1333 editors. *Staying Masai? Livelihoods, conservation and development in East African*  
1334 *rangelands*. Springer, New York.  
1335
- 1336 **123.** Western D, Groom R, Worden J (2009) The impact of subdivision and  
1337 sedentarization of pastoral lands on wildlife in an African savanna ecosystem.  
1338 *Biological Conservation* 142: 2538-2546.  
1339
- 1340 **124.** Kideghesho JR (2002) Trends in areas adjacent to Tarangire National  
1341 Park, Tanzania: What Community-Based land use planning can offer?  
1342 Kakakuona[Jan-March]. Ministry of Natural Resources and Tourism, Tanzania.  
1343
- 1344 **125.** Osano PM, Said MY, Leeuw J, Ndiwa N, Kaelo D, Schomers S, Ogutu JO  
1345 (2013) Why keep lions instead of livestock? Assessing wildlife tourism-based  
1346 payment for ecosystem services involving herders in the Masai Mara, Kenya. *Natural*  
1347 *Resources Forum* 37: 242-256.  
1348
- 1349 **126.** Blackburn S, Hopcraft JGC, Ogutu JO, Matthiopoulos J, Frank L (2016)  
1350 Human–wildlife conflict, benefit sharing and the survival of lions in pastoralist  
1351 community-based conservancies. *Journal of Applied Ecology* 53: 1195–1205.

1352

1353 **127.** Western D, Russell S, Cuthill I (2009) The status of wildlife in protected areas  
1354 compared to non-protected areas of Kenya. PloS One 4: e6140.

1355

1356 **128.** Dougherty LS (2014) The ecological viability of wildlife conservancies in the  
1357 Mara ecosystem. Transfer report to spatial ecology and land use unit, faculty of health  
1358 and life sciences, Oxford Brookes University. Unpublished Report.

1359

1360 **129.** Nkedianye D, Radeny M, Kristjanson P, Herrero M (2009) Assessing returns to  
1361 land and changing livelihood strategies in Kitengela Pages 115-150 in K Homewood,  
1362 P Trench, and P Kristjanson, editors. Staying Masai? Livelihoods, Conservation and  
1363 Development in East African Rangelands. Springer-Verlag, London.

1364

1365 **130.** de Leeuw JM, Said MY, Kifugo S, Ogutu JO, Osano P, de Leeuw J (2014)  
1366 Spatial variation in the willingness to accept payments for conservation of a migratory  
1367 wildlife corridor in the Athi-Kaputiei Plains, Kenya. Ecosystem Services 8: 16-24.

1368

1369 **131.** Matiko D (2014) Wildlife conservation leases are considerable conservation  
1370 options outside Protected Areas: The Kitengela-Nairobi National Park Wildlife  
1371 Conservation Lease Program. Journal of Ecosystem and Ecography. 4:2.  
1372 <http://dx.doi.org/10.4172/2157-7625.1000146>.

1373

1374 **132.** Nelson F, Foley C, Foley LS, Lemos A, Loure E, Peterson D, Peterson  
1375 MPeterson T, Sachedina H, Williams A (2010) Payments for ecosystem services as a

- 1376 framework for community-based conservation in Northern Tanzania. Conservation  
1377 Biology 24: 78–85.  
1378
- 1379 **133.** Morrison TA, Bolger DT (2014) Connectivity and bottlenecks in a migratory  
1380 wildebeest *Connochaetes taurinus* population. Oryx 48: 613-621.  
1381
- 1382 **134.** Norton-Griffiths, M (2000) Wildlife losses in Kenya: An analysis of  
1383 conservation policy. Natural Resources Modelling 13: 13-34.  
1384
- 1385 **135.** Republic of Kenya (2013) The Wildlife Conservation and Management Act,  
1386 2013. Kenya Gazette Supplement No. 181, Acts No. 47, Sixth Schedule. Nairobi.  
1387 Available at: [http://kenyalaw.org/kl/fileadmin/pdfdownloads/Acts/  
1388 WildlifeConservationandManagement%20Act2013.pdf](http://kenyalaw.org/kl/fileadmin/pdfdownloads/Acts/WildlifeConservationandManagement%20Act2013.pdf). Kenya Gazette  
1389 Supplement No. 18/ (Acts No. 47). Republic of Kenya.  
1390
- 1391 **136.** Ministry of Tourism and Wildlife (2018) National Wildlife Strategy 2030.  
1392 Government of Kenya Publication, Nairobi.  
1393
- 1394 **137.** Ojwang' GO, Wargute PW, Said MY, Worden JS, Davidson Z, Muruthi P, Kanga  
1395 E, Ihwagi F, Okita-Ouma B (2017) Wildlife migratory corridors and dispersal areas:  
1396 Kenya rangelands and coastal terrestrial ecosystems. Government of the Republic of  
1397 Kenya, Nairobi.  
1398

- 1399 **138.** United Republic of Tanzania (2018) Wildlife Conservation (Wildlife corridors,  
1400 dispersal areas, buffer zones and migratory routes) Regulations 2018. Government  
1401 Printer, Dar es Saalam.  
1402
- 1403 **139.** Ogutu J O, Owen-Smith N, Piepho H P, Kuloba B, Edebe J (2012) Dynamics of  
1404 ungulates in relation to climatic and land use changes in an insularized African  
1405 savanna ecosystem. *Biodiversity Conservation* 21:1033-1053.  
1406
- 1407 **140.** Swynnerton GH (1958) Fauna of the Serengeti National Park. *Mammalia* 22:  
1408 435-450.  
1409
- 1410 **141.** Grizmek B, Grizmek M (1960) Serengeti shall not die. Hamish Hamilton, Ltd.  
1411 London. 344pp.  
1412
- 1413 **142.** Stewart D RM, Talbot LM (1962) Census of wildlife in the Serengeti, Mara and  
1414 Loita Plains. *East African Agricultural and Forestry Journal* 28: 58-60.  
1415
- 1416 **143.** Anderson GD, Talbot, LM (1965) Soil factors affecting the distribution of the  
1417 grassland types and their utilisation by wild animals on the Serengeti plains,  
1418 Tanganyika. *Journal of Ecology* 53: 33-56.  
1419
- 1420 **144.** Watson RM (1967) The population ecology of the wildebeest (*Connochaetes*  
1421 *taurinus albojubatus* Thomas) in the Serengeti. PhD Thesis, Cambridge University.  
1422

- 1423 **145.** Bell R V H (1971) A grazing ecosystem in the Serengeti. Scientific American  
1424 224: 86-93.  
1425
- 1426 **146.** Kreulen D (1975) Wildebeest habitat selection on the Serengeti Plains, Tanzania,  
1427 in relation to Calcium and lactation. African Journal of Ecology 13: 297-304.  
1428
- 1429 **147.** McNaughton S J (1976) Serengeti migratory wildebeest: Facilitation of energy  
1430 flow by grazing. Science 191 (4222): 92-94.  
1431
- 1432 **148.** Hilborn R, ARE Sinclair (1979) A simulation of the wildebeest population, other  
1433 ungulates and their predators. Pages 287–309 in ARE Sinclair and MNorton-Griffith,  
1434 editors. Serengeti: dynamics of an ecosystem. University of Chicago Press, Chicago.  
1435
- 1436 **149.** Sinclair ARE (1979) The eruption of the ruminants. Pp 82–103 In: A R E  
1437 Sinclair and M Norton-Griffith, editors. Serengeti: dynamics of an ecosystem.  
1438 University of Chicago Press, Chicago.  
1439
- 1440 **150.** Sinclair ARE, Norton-Griffiths M (1979) Serengeti: Dynamics of an ecosystem.  
1441 University of Chicago Press, Chicago, USA.  
1442
- 1443 **151.** Bell RVH (1982) The effect of soil nutrient availability on community structure  
1444 in African ecosystems. In: Ecology of tropical savannahs, p. 193-216. ed. BJHuntley,  
1445 Walker BH. Springer, New York.  
1446

- 1447 **152.** Broten MD, Said MY (1995) Population trends of ungulates in and around  
1448 Kenya's Masai Mara Reserve. In: Serengeti II: Dynamics, Management,  
1449 and Conservation of an Ecosystem, p. 169-193. ed. ARE Sinclair. P Arcese. Univ. of  
1450 Chicago Press, Chicago.
- 1451
- 1452 **153.** Fryxell JM (1995) Aggregation and migration by grazing ungulates in relation  
1453 to resources and predators. In: Serengeti II. Dynamics, Management, and Conservation  
1454 of an Ecosystem, p. 257-273. ed. ARE Sinclair, P Arcese. Univ. of Chicago Press,  
1455 Chicago.
- 1456
- 1457 **154.** Murray MG (1995) Specific nutrients requirements and migration of wildebeest.  
1458 Pp 231-56 In: Serengeti II; dynamics, management and conservation of an ecosystem.  
1459 University of Chicago Press, Chicago, USA.
- 1460
- 1461 **155.** Wilmshurst JF, Fryxell JM, Farm BP, Sinclair ARE, Henschel CP (1999) Spatial  
1462 distribution of Serengeti wildebeest in relation to resources. Canadian Journal of  
1463 Zoology 77: 1223-1232.
- 1464
- 1465 **156.** Gereta E, Wolanski E, Chiombola EAT (2003) Assessment of the environmental,  
1466 social and economic impacts on the Serengeti ecosystem of the developments in the  
1467 Mara. River catchment in Kenya. Amala Project Report, 59pp. TANAPA, FZS,  
1468 Arusha, Tanzania.
- 1469
- 1470

- 1471 **157.** Musiega DE, Kazadi SN (2004) Simulating the East African wildebeest migration  
1472 patterns using GIS and remote sensing. *African Journal of Ecology* 42: 355-62.  
1473
- 1474 **158.** Boone RB, Thirgood SJ, Hopcraft JGC (2006) Serengeti wildebeest migratory  
1475 patterns modeled from rainfall and new vegetation growth. *Ecology* 87: 1987-94.  
1476
- 1477 **159.** Sinclair ARE, Mduma SA, Hopcraft JGC, Fryxell J M, Hilborn R A Y, Thirgood  
1478 S (2007) Long-Term Ecosystem Dynamics in the Serengeti: Lessons for  
1479 Conservation. *Conservation Biology* 21: 580-590.  
1480
- 1481 **160.** Holdo R M, Holt R D, Fryxell J M (2009) Grazers, browsers, and fire influence  
1482 the extent and spatial pattern of tree cover in the Serengeti. *Ecological Applications*  
1483 19: 95-109.  
1484
- 1485 **161.** Bholá N, Ogutu J O, Piepho H-P, Said MY, Reid RS, Hobbs NT, Olff H (2012b)  
1486 Comparative changes in density and demography of large herbivores in the Masai  
1487 Mara Reserve and its surrounding human-pastoral ranches in Kenya. *Biodiversity*  
1488 *Conservation* 21: 1509-1530.  
1489
- 1490 **162.** Bedelian C (2014) Saving the Great Migrations: Declining wildebeest in East  
1491 Africa? *Environmental Development* 9: 101-109.  
1492  
1493

- 1494 **163.** Stabach JA, Boone RB, Worden JS, Florant G (2015) Habitat disturbance effects  
1495 on the physiological stress response in resident Kenyan white-bearded wildebeest  
1496 (*Connochaetes taurinus*). Biological Conservation 182:177–186.  
1497
- 1498 **164.** Ottichilo WK (2000) Wildlife Dynamics: An Analysis of Change in the Masai  
1499 Mara Ecosystem of Kenya. PhD Dissertation, ITC, The Netherlands.  
1500
- 1501 **165.** Sheehan MM (2016) Determining drivers for wildebeest (*Connochaetes*  
1502 *taurinus*) distribution in the Masai Mara National Reserve and surrounding Group  
1503 Ranches (Doctoral dissertation, Miami University).  
1504
- 1505 **166.** McCutcheon JT (1910) In Africa. The Bobbs-Merrill Company. Indianapolis,  
1506 USA.  
1507
- 1508 **167.** Foster JB, McLaughlin R (1968) Nairobi National Park game census, 1967.  
1509 East African Wildlife Journal 6: 152-54.  
1510
- 1511 **168.** Casebeer RL, Koss GG (1970) Food habits of wildebeest, zebra, hartebeest and  
1512 cattle in Kenya Masailand African Journal of Ecology 8: 25-36.  
1513
- 1514 **169.** Petersen JCB, Casebeer RL (1972) Distribution, population status and group  
1515 composition of wildebeest (*Connochaetes taurinus* Burchell) and zebra (*Equus*  
1516 *burchelli* Gray) on the Athi-Kapiti plains, Kenya. Wildlife Management Project.  
1517 UNDP/FAO KEN/71 /526, Project Working Document No. 1.  
1518



- 1519 **170.** Casebeer RL, Mbai HJ (1974) Animai mortality 1973/74. Kajiado District,  
1520 FAOProject DP/KEN/71/526. Working Document. Report No. 5.  
1521
- 1522 **171.** Owaga M L (1975) The feeding ecology of wildebeest and zebra in Athi-Kaputei  
1523 Plains. African Journal of Ecology 13: 375-83.  
1524
- 1525 **172.** Hillman JC (1979) The biology of the eland (*Taurotraaus oryx* Pallas) in the  
1526 wild. PhD. University of Nairobi.  
1527
- 1528 **173.** Trzebinski E (1985) The Kenya Pioneers. Cox and Wyman Ltd, Great Britain.  
1529
- 1530 **174.** Gichohi HW (2003) Direct payments as a mechanism for conserving important  
1531 wildlife corridor links between Nairobi National Park and its wider ecosystem: The  
1532 Wildlife Conservation Lease Program. In Vth World Parks Congress.  
1533
- 1534 **175.** Ego WK, Mbuvi D M, Kibet PFK (2003) Dietary composition of wildebeest  
1535 (*Connochaetes taurinus*), kongoni (*Alcephalus buselaphus*) and cattle (*Bos indicus*),  
1536 grazing on a common ranch in south-central Kenya. African Journal of Ecology 41:  
1537 83-92.  
1538
- 1539 **176.** Imbahale SS, Githaiga J M, Chira RM, Said MY (2008) Resource utilization by  
1540 large migratory herbivores of the Athi-Kapiti ecosystem. African Journal of Ecology  
1541 46: 43-51.  
1542

- 1543 **177.** Croze H (1978) Aerial surveys undertaken by the Kenya Wildlife Management  
1544 Project: methodologies and results. FAO Project DP/KEN/71/526. Working  
1545 document. Report No. 16.  
1546
- 1547 **178.** Campbell DJ, Gichohi H, Mwangi A, Chege L (2000) Land Use Conflicts in  
1548 Kajiado District, Kenya. Land Use Policy 17: 337-48.  
1549
- 1550 **179.** Worden J, Reid RS, Gichohi H (2003) Land-use impacts on large wildlife and  
1551 livestock in the swamps of the Greater Amboseli Ecosystem, Kajiado District,  
1552 Kenya Lucid Project. International Livestock Research Institute, Nairobi,  
1553 Kenya. [https://cgspace.cgiar.org/bitstream/handle/10568/1901/Lucid\\_wp27\\_part1.pdf](https://cgspace.cgiar.org/bitstream/handle/10568/1901/Lucid_wp27_part1.pdf?sequence=1)  
1554 [?sequence=1](https://cgspace.cgiar.org/bitstream/handle/10568/1901/Lucid_wp27_part1.pdf?sequence=1).  
1555
- 1556 **180.** Okello M M (2005) Land use changes and human-wildlife conflicts in  
1557 the Amboseli Area, Kenya. Human Dimensions of Wildlife 10: 19-28.  
1558
- 1559 **181.** Sitati N, Lekishon K, Bakari S, Warinwa F, Mwiu S N, Gichohi N, Mukeka J  
1560 (2014). Wildebeest (*Connochaetes taurinus*) Population densities and distribution in  
1561 dry and wet season in the Kilimanjaro landscape. Natural Resources 5: 810.  
1562
- 1563 **182.** Galanti V, Tosi G, Rossi R, Foley C (2000) The Use of GPS radio-collars to  
1564 track elephants (*Loxodonta africana*) in the Tarangire National Park (Tanzania).  
1565 Hystrix 11: 27-37.  
1566

1567 **183.** TAWIRI (2001) Tarangire Ecosystem: Wet Season Systemmatic

1568 ReconnaissanceFlight Count, May 2001. TAWIRI, Arusha, Tanzania.

1569

1570 **184.** Gereta E, Meing'ataki GEO, Mduma SAR, Wolanski E (2004) The role

1571 ofwetlands in wildlife migration in the Tarangire ecosystem, Tanzania. Wetlands

1572 Ecology and Management 12: 285-99.

1573

1574 **185.** Newmark WD (2008) Isolation of African protected areas. *Frontiers in Ecology*

1575 and the Environment 6:321-8.

1576

1577 **Figure legends**

1578 **Fig 1. Wildebeest migration in the greater Serengeti-Mara ecosystem in East**

1579 **Africa. (Photo credit: ARE Sinclair).**

1580

1581 **Fig 2. Map showing the general extent of Masailand in Kenya and Tanzania and**

1582 **the five study ecosystems with eight populations: 1 = Serengeti Ecosystem, 2 =**

1583 **Masai Mara Ecosystem, 3 = Narok County, 4 = Athi-Kaputiei Ecosystem, 5 =**

1584 **Machakos County, 6 = Greater Amboseli Ecosystem, 7 = West Kajiado and 8 =**

1585 **Tarangire-Manyara Ecosystem populations. Notes: NCA = Ngorongoro Conservation**

1586 **Area, MGR = Maswa Game Reserve, SNP =Serengeti National Park, IGR = Ikorongo**

1587 **Game Reserve, GGR = Grumeti Game Reserve, MMNR = Masai Mara National**

1588 **Reserve, NNP = Nairobi National Park, ANP = Amboseli National Park, LMNP =**

1589 **Lake Manyara National Park, LGCA = Lokisale Game Controlled Area, TNP =**

1590 **Tarangire National Park and MGR\* = Mkungunero Game Reserve. Use of each**

1591 **seasonal area by the study populations is described in the text.**

1592 **Fig 3. Map showing the general area occupied by the (a) Greater Serengeti-**  
1593 **Mara, b) Athi-Kaputiei, (c) Greater Amboseli and (d) Tarangire-Manyara**  
1594 **ecosystems.** For each ecosystem, the status of routes of migratory wildebeest post-  
1595 2000 in relation to the distribution of agriculture and fences is highlighted. The  
1596 current wildlife conservancies (and wildlife-livestock ranches) are provided for the  
1597 Masai Mara, Athi-Kaputiei and Greater Amboseli ecosystems of Kenya. Also shown  
1598 are extreme land fragmentation through fences in Athi-Kaputiei and recent emergence  
1599 of fences along the eastern and south eastern borders of the Mara Conservancies.

1600

1601 **Fig 4. Movement tracks of GPS collared wildebeest during 2010-2013 (colored**  
1602 **lines) in Kenya (A = Loita Plains in Masai Mara Ecosystem, B = Athi-Kaputiei**  
1603 **Ecosystem, C = Greater Amboseli Ecosystem).** Protected areas (1 = Masai Mara  
1604 National Reserve, 2 = Serengeti National Park in Tanzania, 3 = Nairobi National  
1605 Park, 4 Amboseli National Park) are partially obscured.

1606

1607 **Fig 5. Trends in population size of migratory wildebeest populations in a)**  
1608 **Serengeti-Mara ecosystem, b) Masai Mara ecosystem, c) Narok County in which**  
1609 **Masai Mara is located, d) Athi-Kaputiei ecosystem, e) Machakos County, f)**  
1610 **Greater Amboseli ecosystem, g) West Kajiado and h) Tarangire-Manyara**  
1611 **ecosystem.**

1612

1613 **Supporting information**

1614 **Table S1. The field data form used to collect information for ground truthing**  
1615 **historical information on land use and cover changes in the Tarangire-Manyara**  
1616 **ecosystem of Tanzania.** We uploaded the coordinates and their Ids into a Global

1617 Positioning System (GPS) and used them to locate sampling points. We collected  
1618 information on the following attributes for each sampling point. (1) Was there  
1619 agriculture at the location in 1984, 2000 or 2006-2007? (2) If yes, was agriculture  
1620 practiced on small or large scale? (3) Was agriculture irrigated or not? (4) When did  
1621 agriculture start? (5) Photographs of the sampling point. (6) Crop types cultivated at  
1622 each sampling location. (7) We empirically assessed the change type we had  
1623 identified during initial image interpretation in the office and assigned change codes  
1624 A, B, C or D described in the table to the observed changes. (8) General comments.

1625

## 1626 **Supporting information**

1627 **Table S1.**

1628 **Table S2. The five ecosystems with migratory wildebeest populations in East**  
1629 **Africa, their current status and earlier studies.**

1630

1631 **Table S3. Wildlife conservancies in Masai Mara, their names, size, number of**  
1632 **landowners that pooled land to form the conservancy, tourist camps, tourist**  
1633 **beds, rangers and scouts and jobs created by each conservancy and year of**  
1634 **establishment.**

1635

1636 **Table S4. Wildlife conservancies or ranches, their names and sizes in Machakos**  
1637 **Plains (adjoining the Athi-Kaputiei), Athi-Kaputiei and Greater Amboseli**  
1638 **ecosystem.** The total area covered in each ecosystem is 347.0, 40.6 and 1046.5 km<sup>2</sup> in  
1639 the Machakos Plains, Athi-Kaputiei and Greater Amboseli ecosystems, respectively.

1640

1641 **S1 Data. The estimated population size and standard errors and other details of**  
1642 **the aerial surveys of wildebeest for the Serengeti-Mara (1957-2012) and**  
1643 **Tarangire-Manyara (1987-2016) ecosystems.**

1644

1645 **S2 Data. The estimated population size and standard errors and other details of**  
1646 **the aerial surveys of wildebeest for the Masai Mara Ecosystem (1977-2016)**  
1647 **ecosystems.**

1648

1649 **S3 Data. The estimated population size and standard errors and other details of**  
1650 **the aerial surveys of wildebeest for the Athi-Kaputiei Ecosystem (1977-2014).**

1651

1652 **S4 Data. The estimated population size and standard errors and other details of**  
1653 **the aerial surveys of wildebeest for the Machakos County (1977-2015).**

1654

1655 **S5 Data. The estimated population size and standard errors and other details of**  
1656 **the aerial surveys of wildebeest for the Greater Amboseli (1977-2014) and**  
1657 **Western Kajiado (1977-2014) ecosystems.**

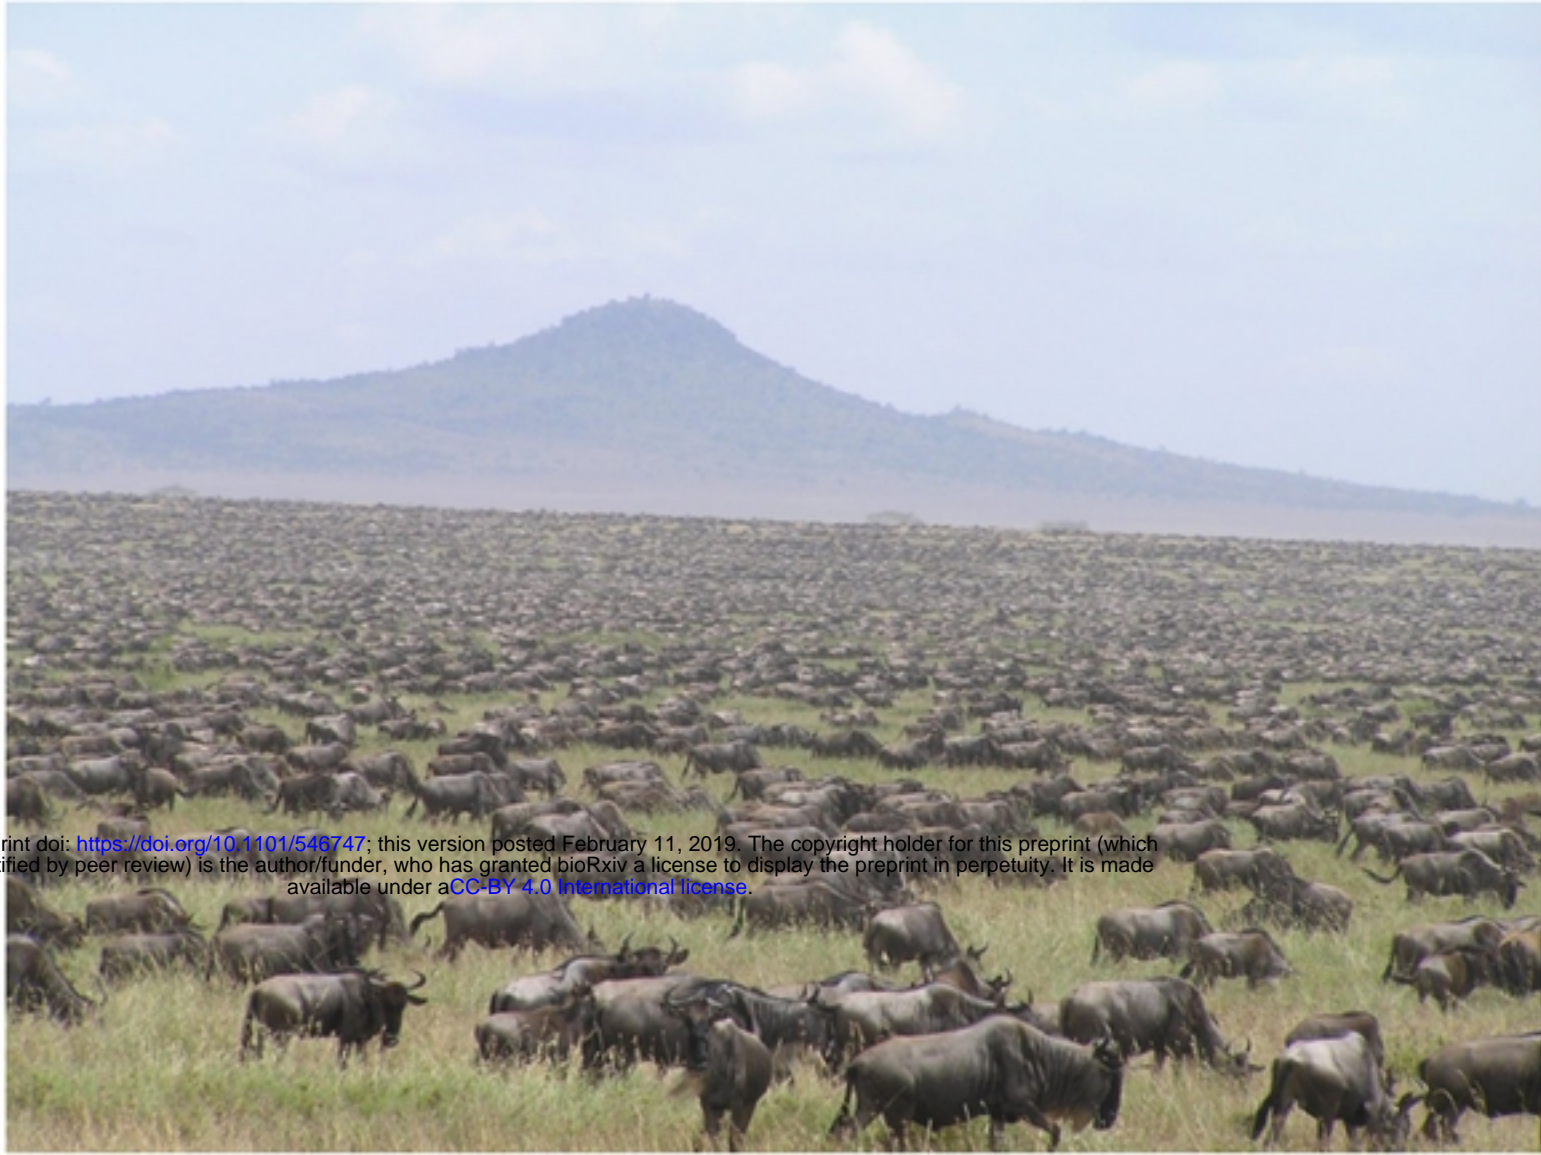

bioRxiv preprint doi: <https://doi.org/10.1101/548747>; this version posted February 11, 2019. The copyright holder for this preprint (which was not certified by peer review) is the author/funder, who has granted bioRxiv a license to display the preprint in perpetuity. It is made available under aCC-BY 4.0 International license.

bioRxiv preprint doi: <https://doi.org/10.1101/546747>; this version posted February 11, 2019. The copyright holder for this preprint (which was not certified by peer review) is the author/funder, who has granted bioRxiv a license to display the preprint in perpetuity. It is made available under aCC-BY 4.0 International license.

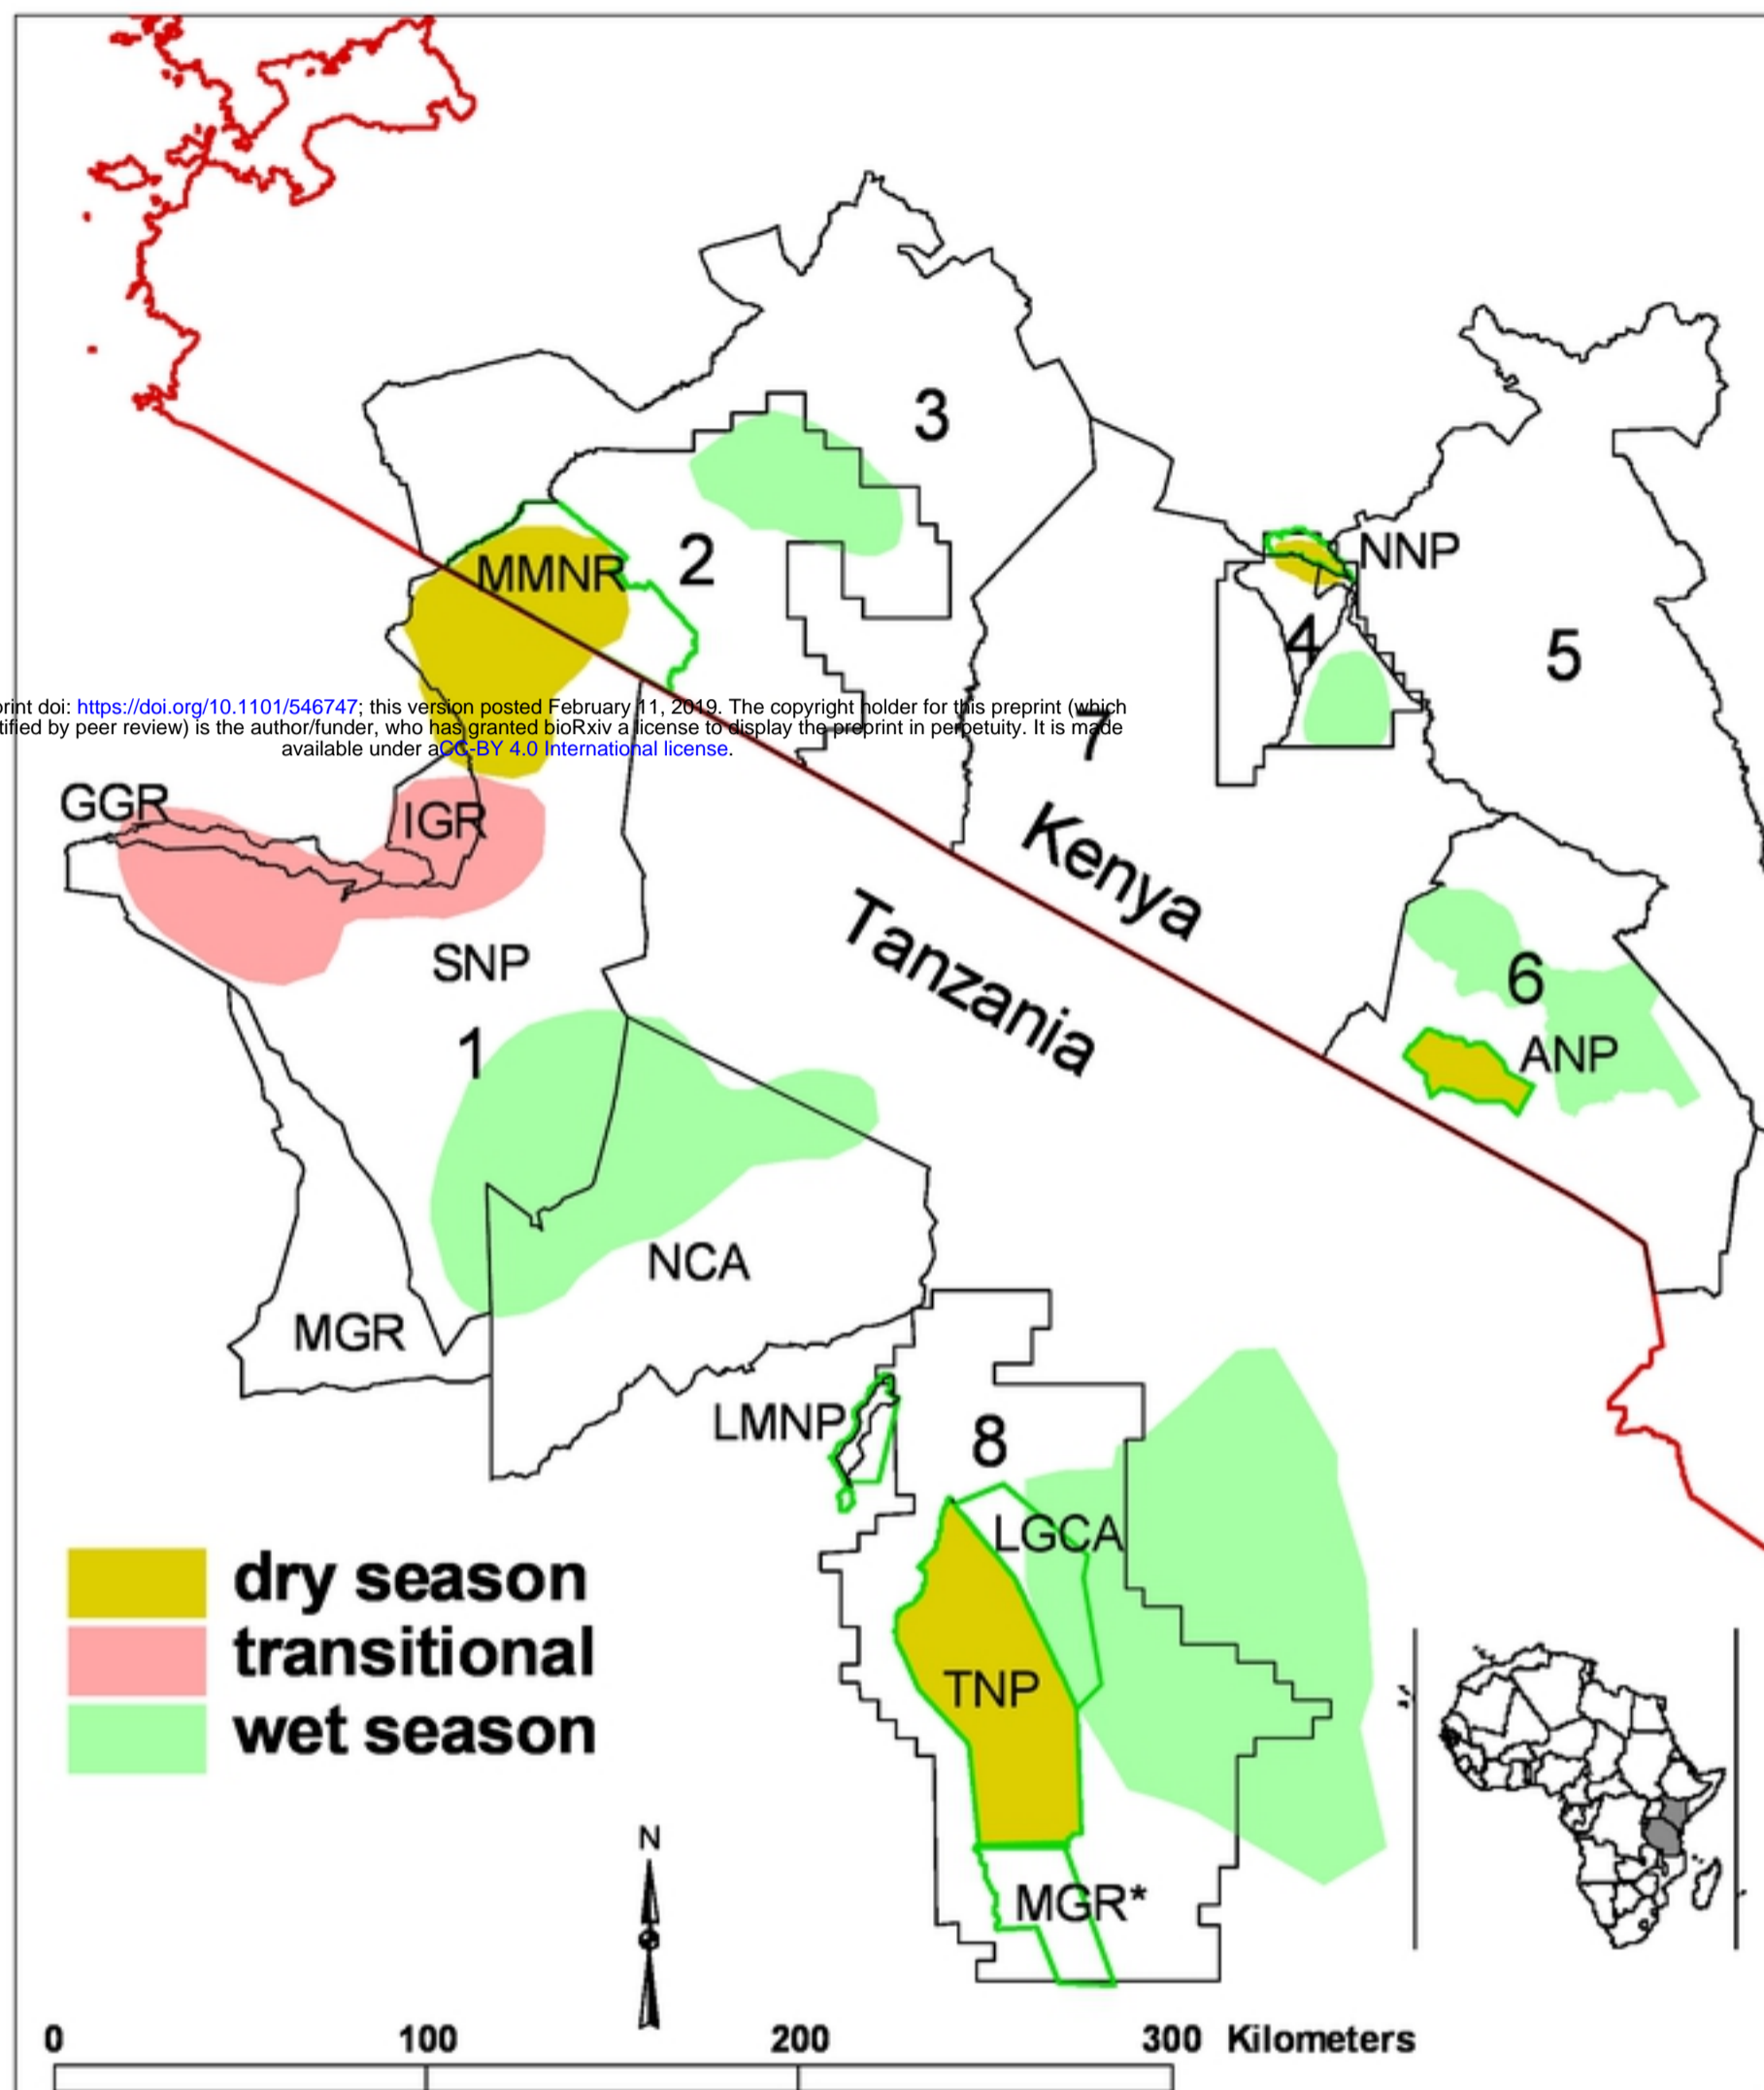

Fig2



bioRxiv preprint doi: <https://doi.org/10.1101/546347>; this version posted February 11, 2019. The copyright holder for this preprint (which was not certified by peer review) is the author/funder, who has granted bioRxiv a license to display the preprint in perpetuity. It is made available under aCC-BY 4.0 International license.

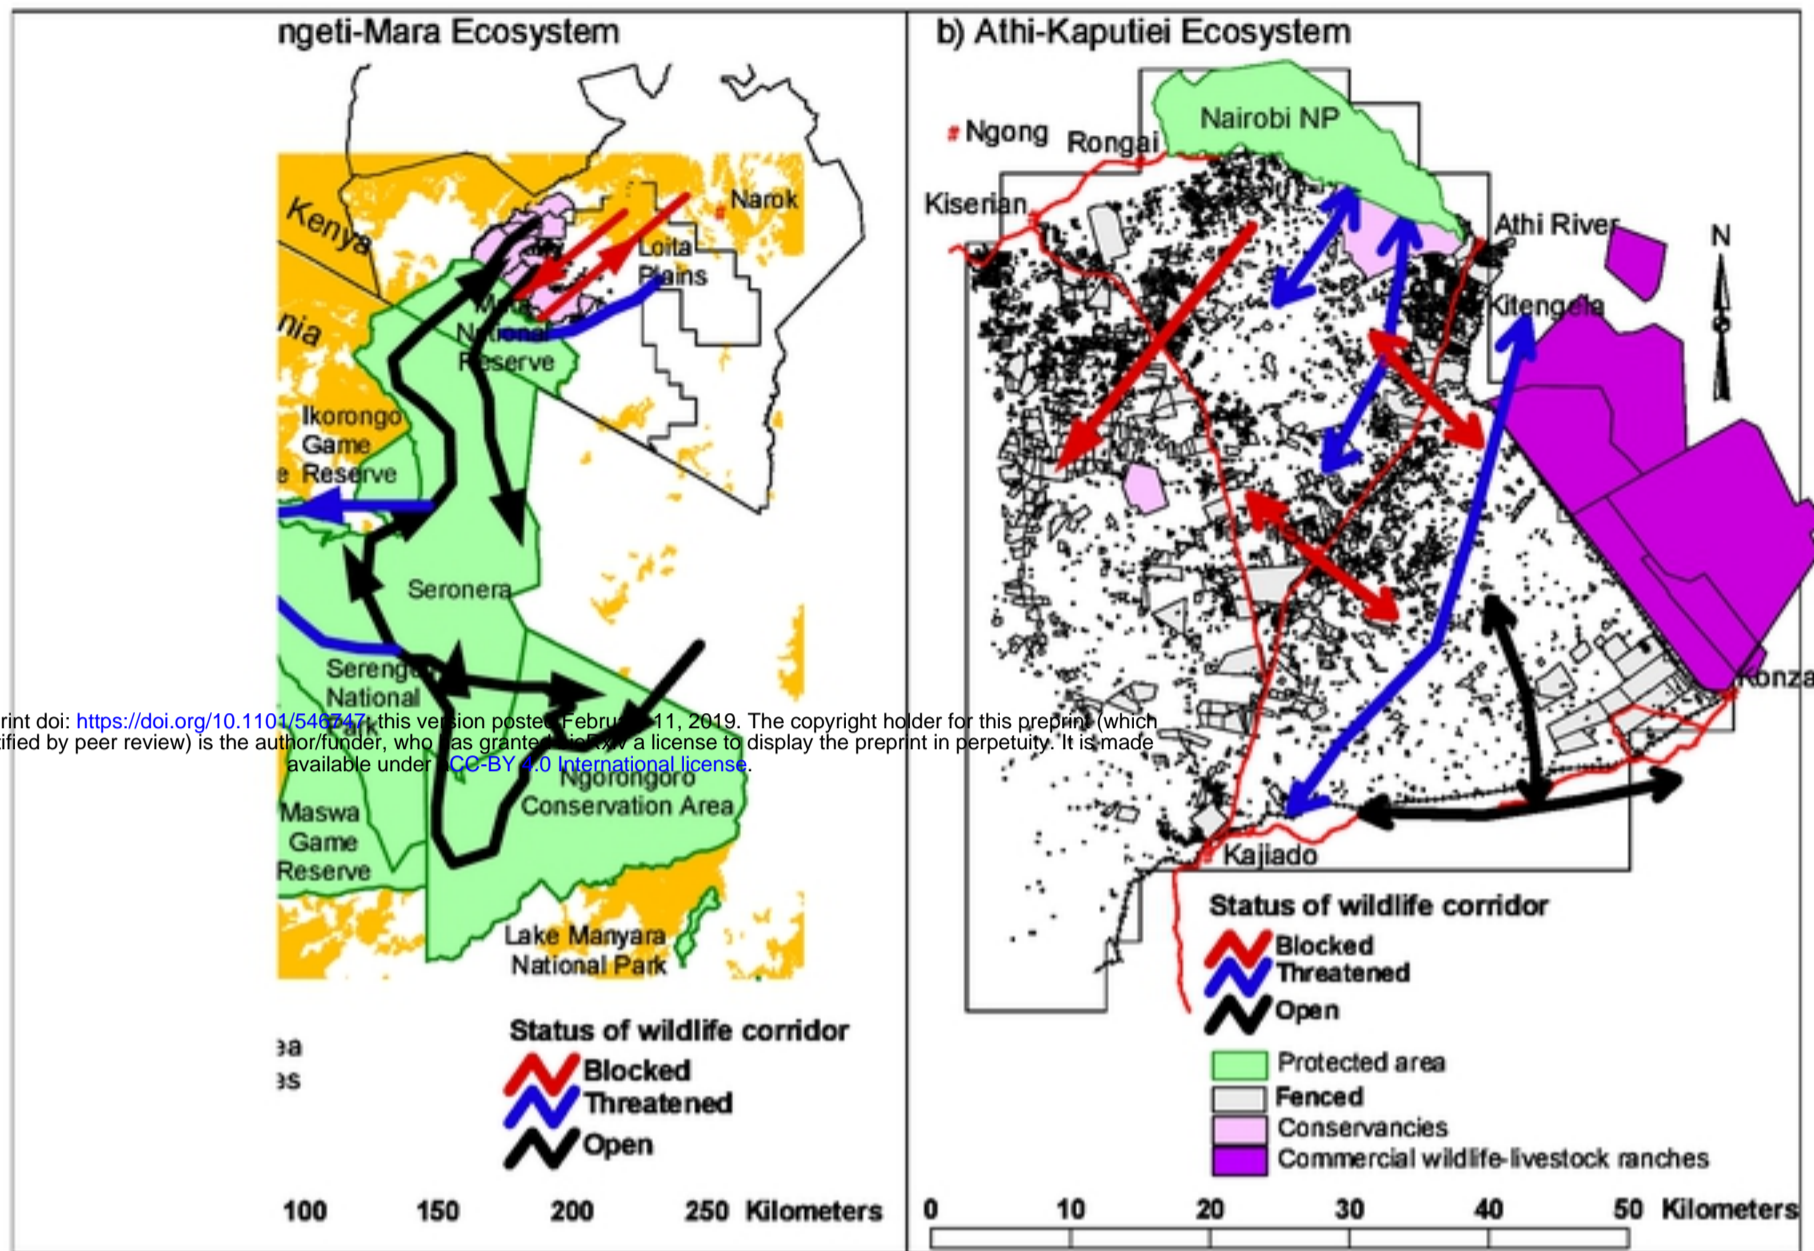

Fig3

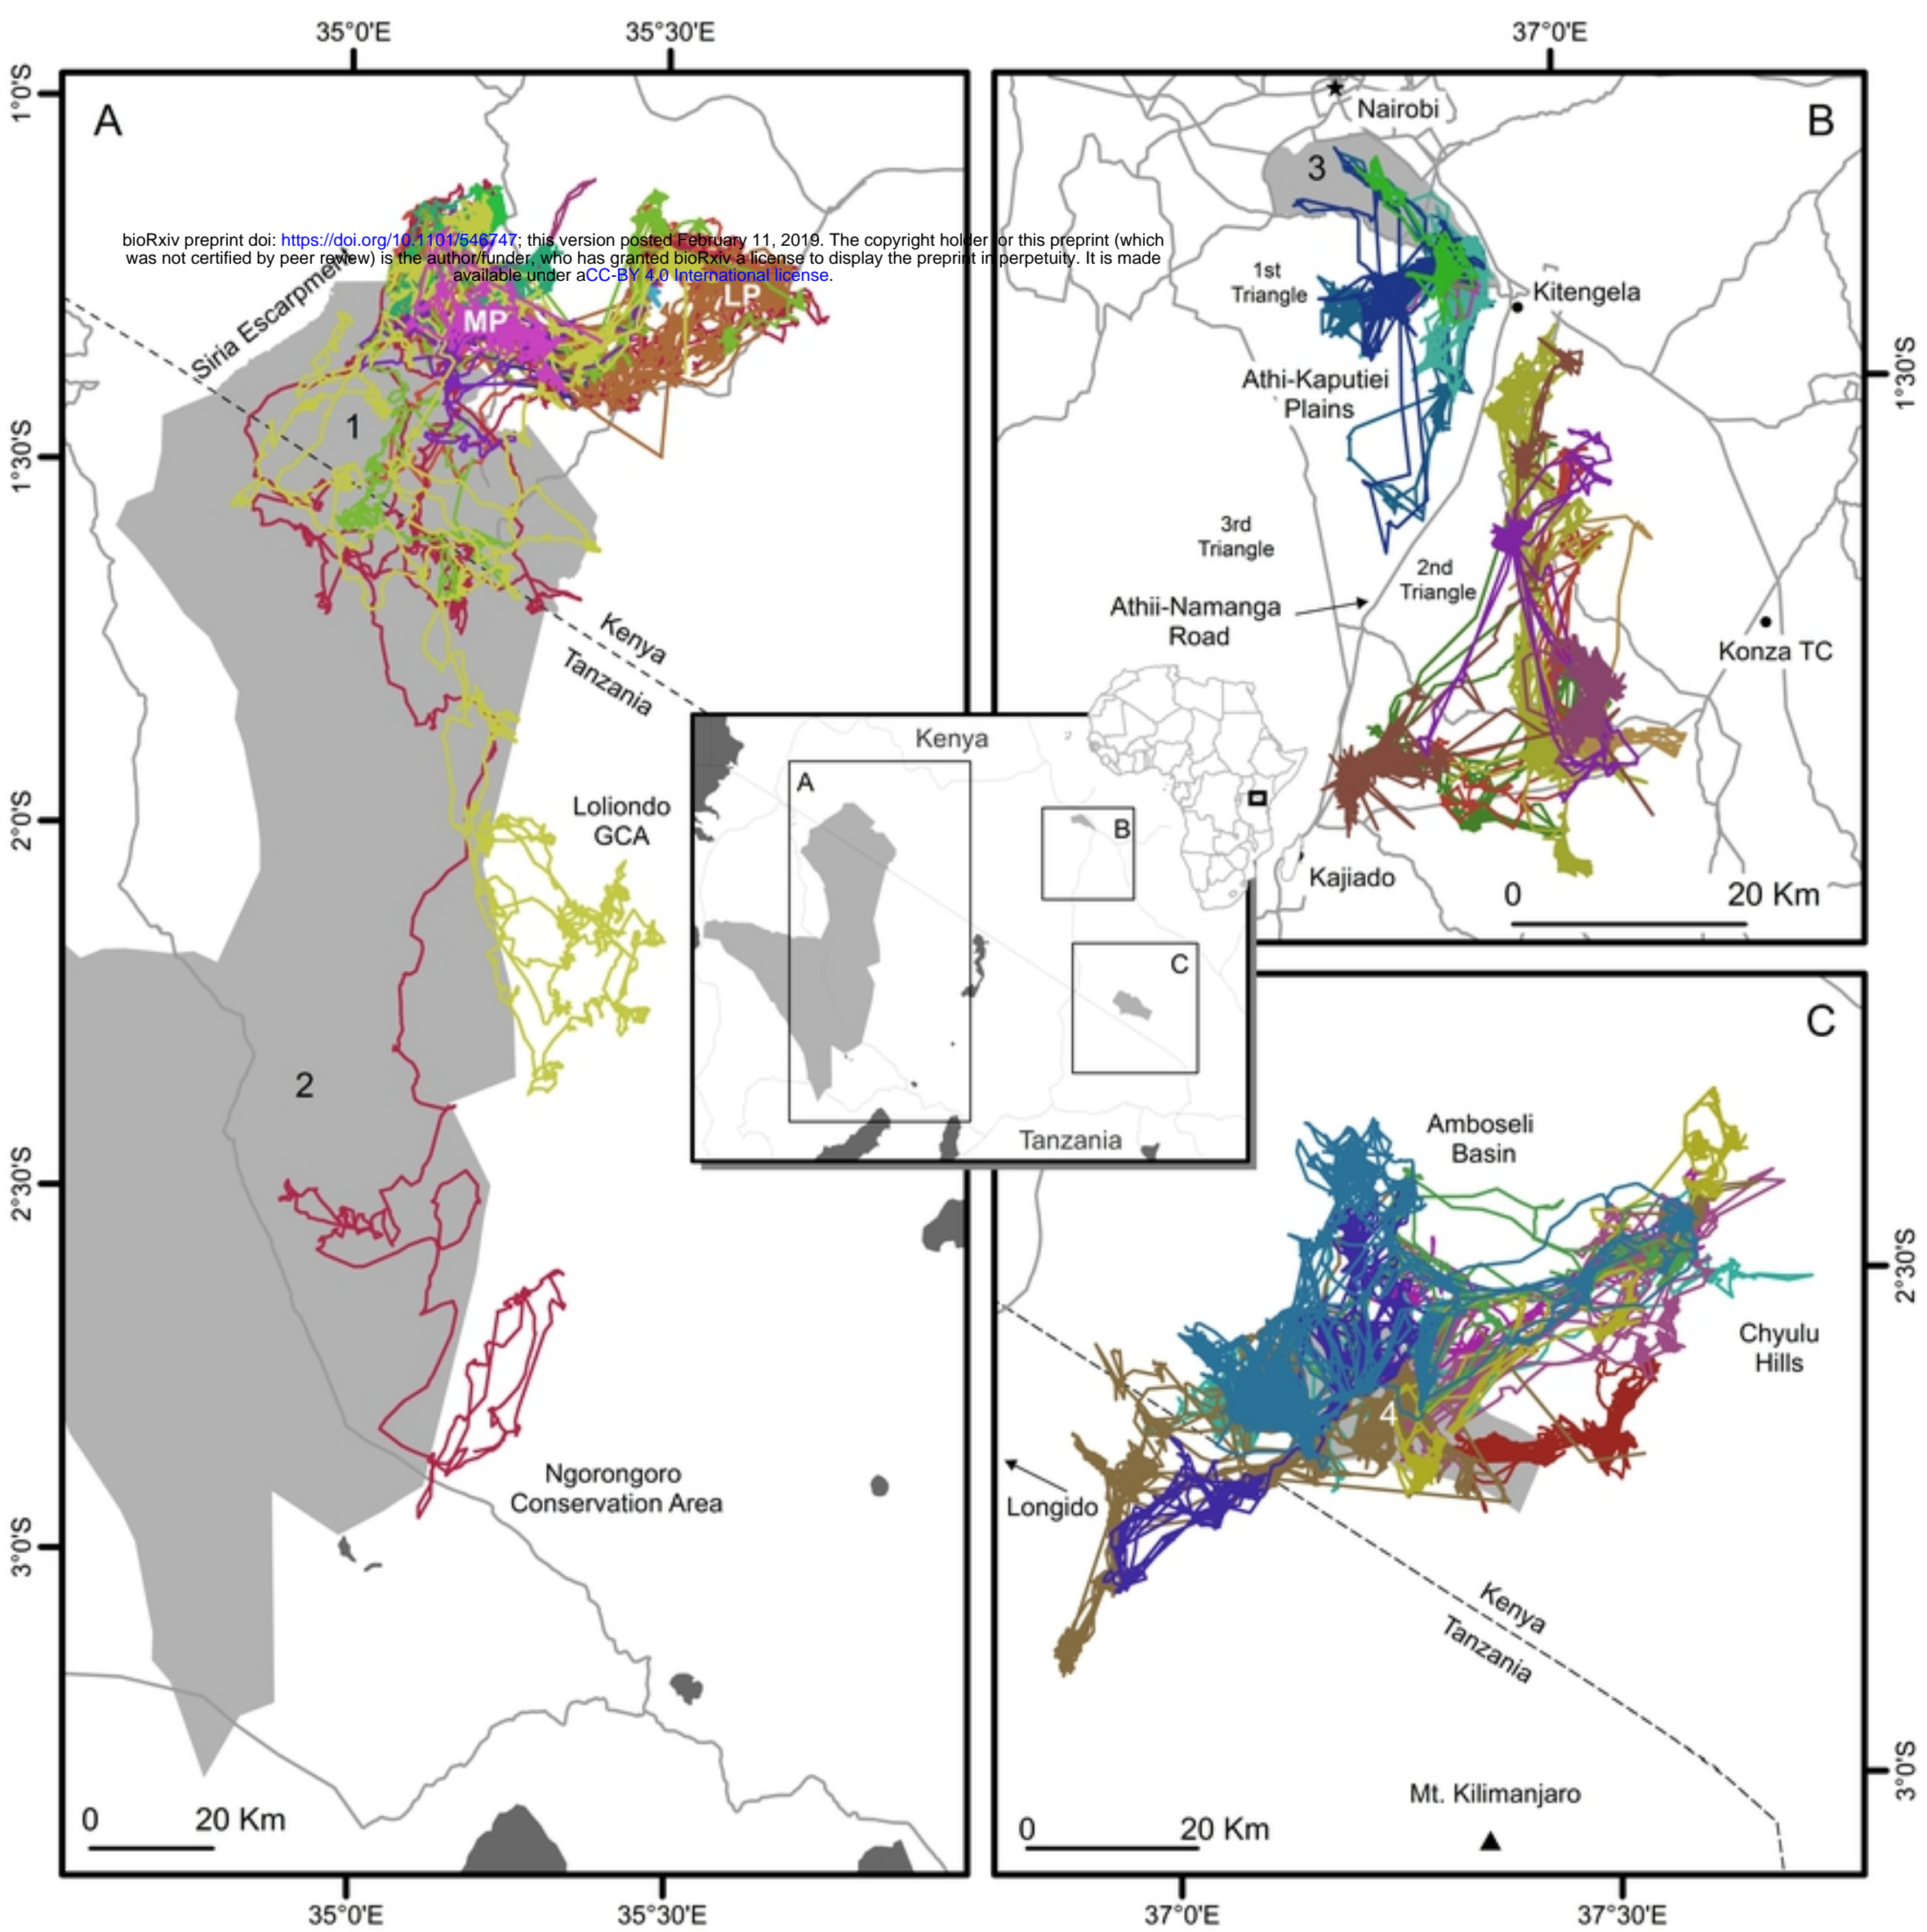

Fig4

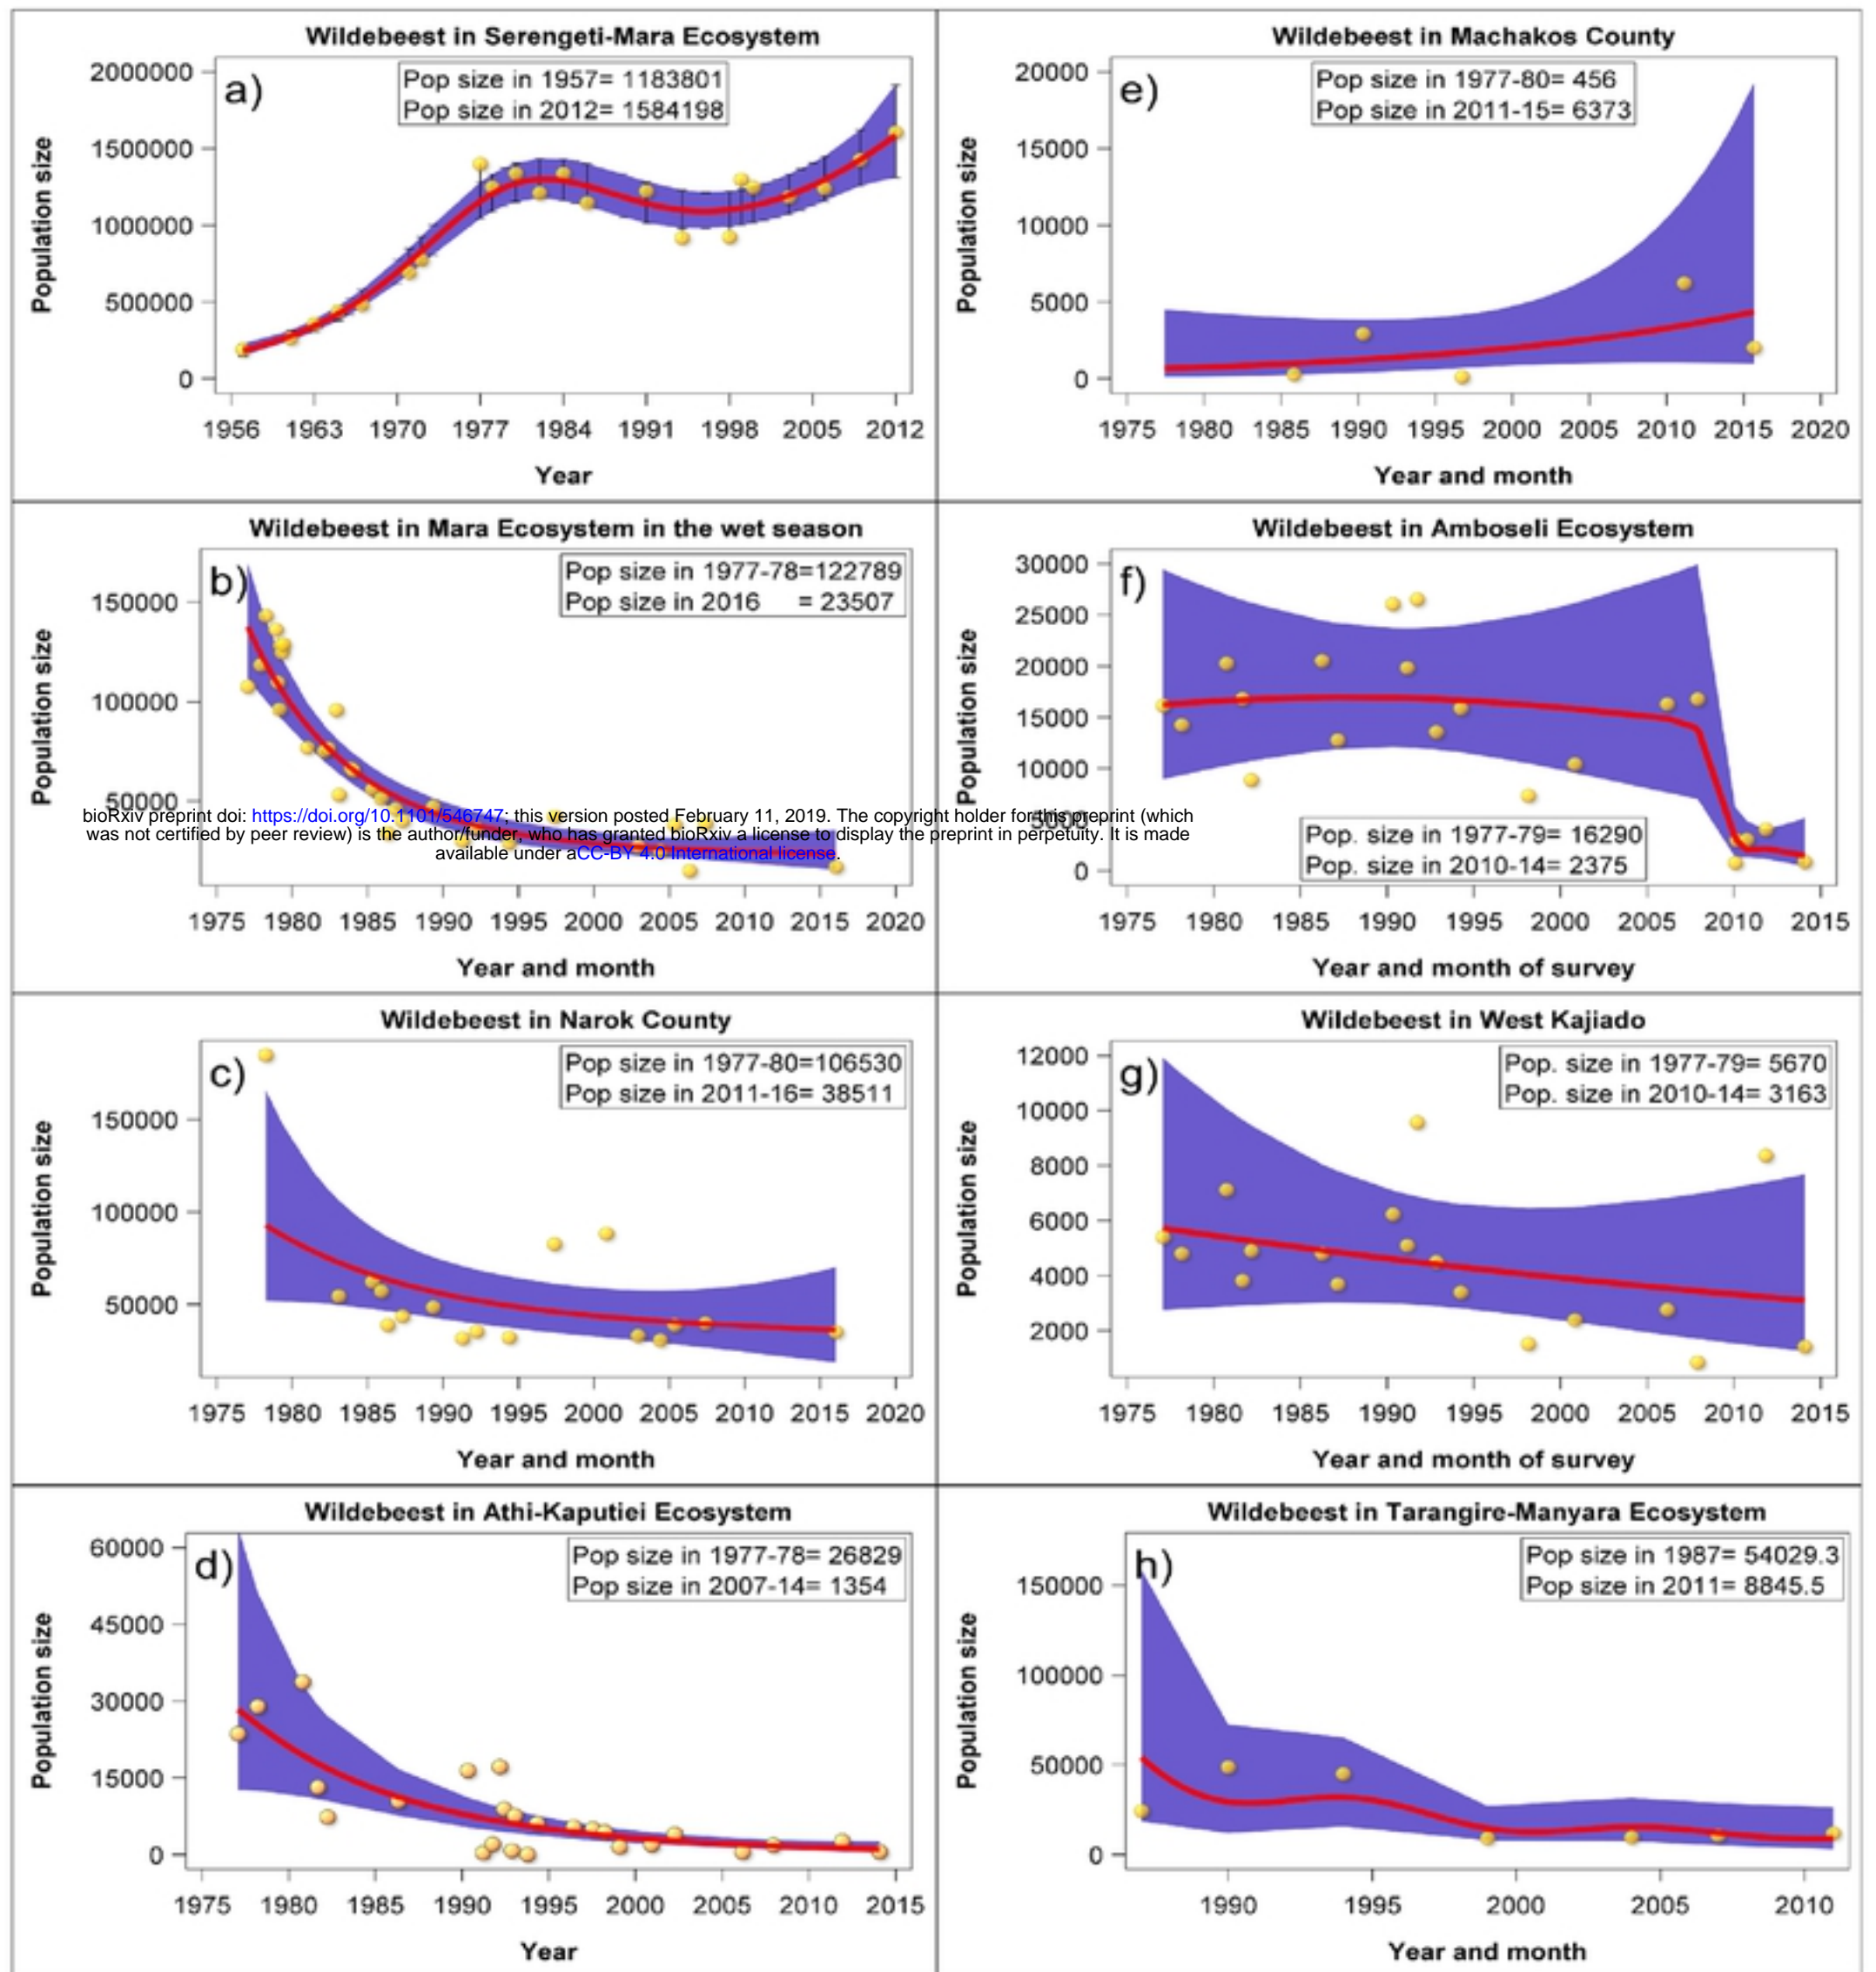

Fig5
